# Supplementary material
Source: bioRxiv or medRxiv preprint supplement (https://www.biorxiv.org/highwire/filestream/30790/field_highwire_adjunct_files/5/105064-6.pdf)

# Supplementary Figure S1

## Human

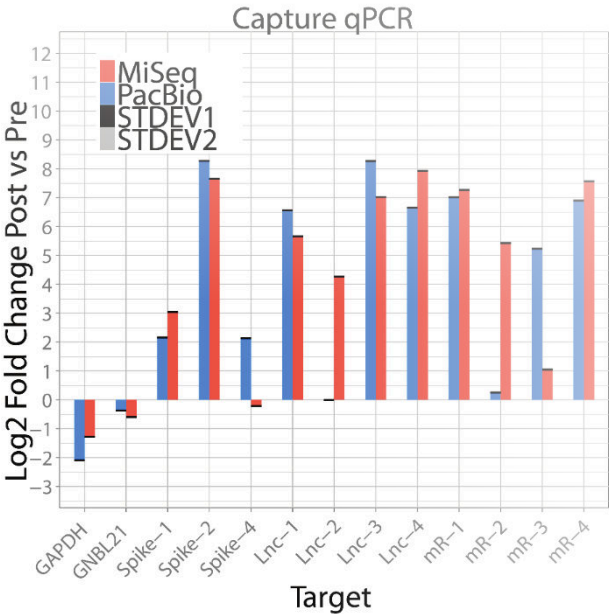

## Mouse

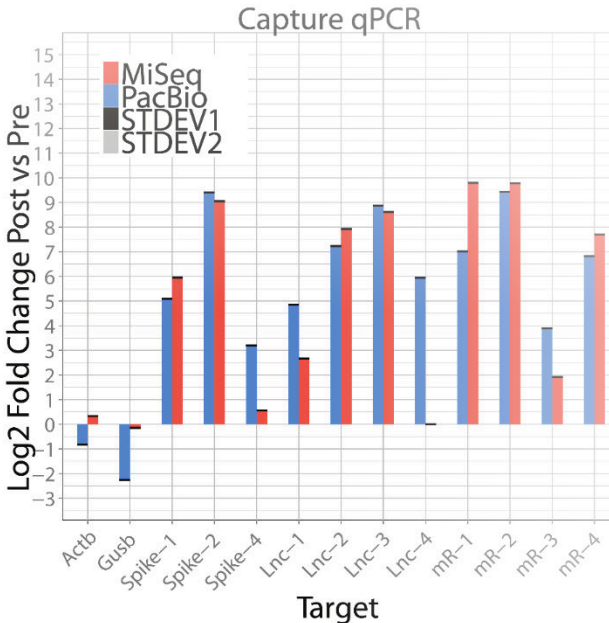

# Supplementary Figure S2

A

|          | Range (nt) | Human      |
|----------|------------|------------|
| <b>1</b> | 200-500    | <b>HS1</b> |
| <b>2</b> | 500-1000   | <b>HS2</b> |
| <b>3</b> | 1000-1500  | <b>HS3</b> |
| <b>4</b> | 1500-2500  | <b>HS4</b> |
| <b>5</b> | >2500      | <b>HS5</b> |

B

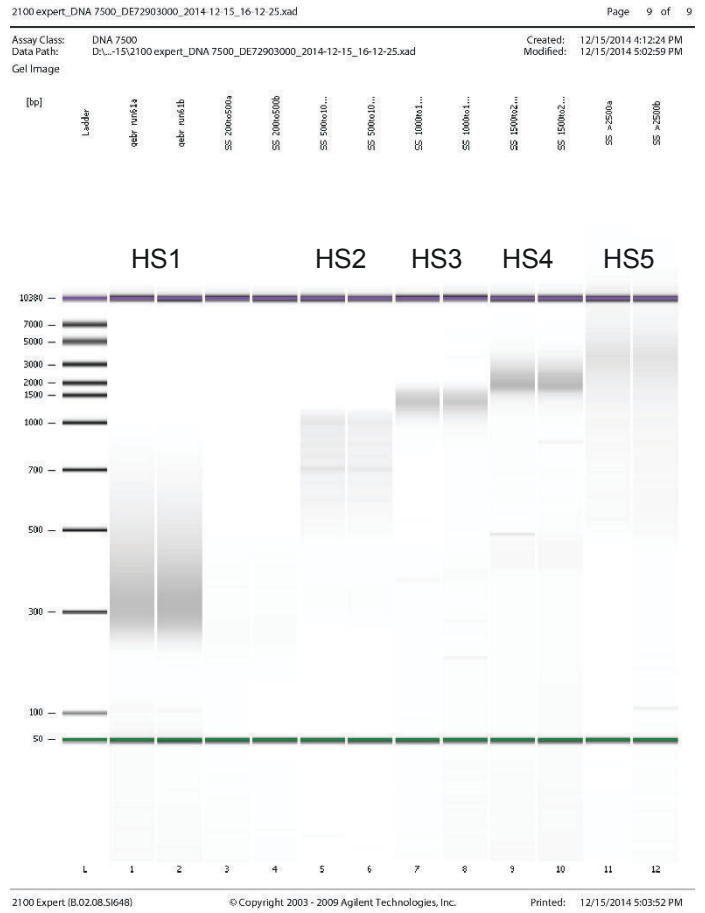

Supplementary Figure S3

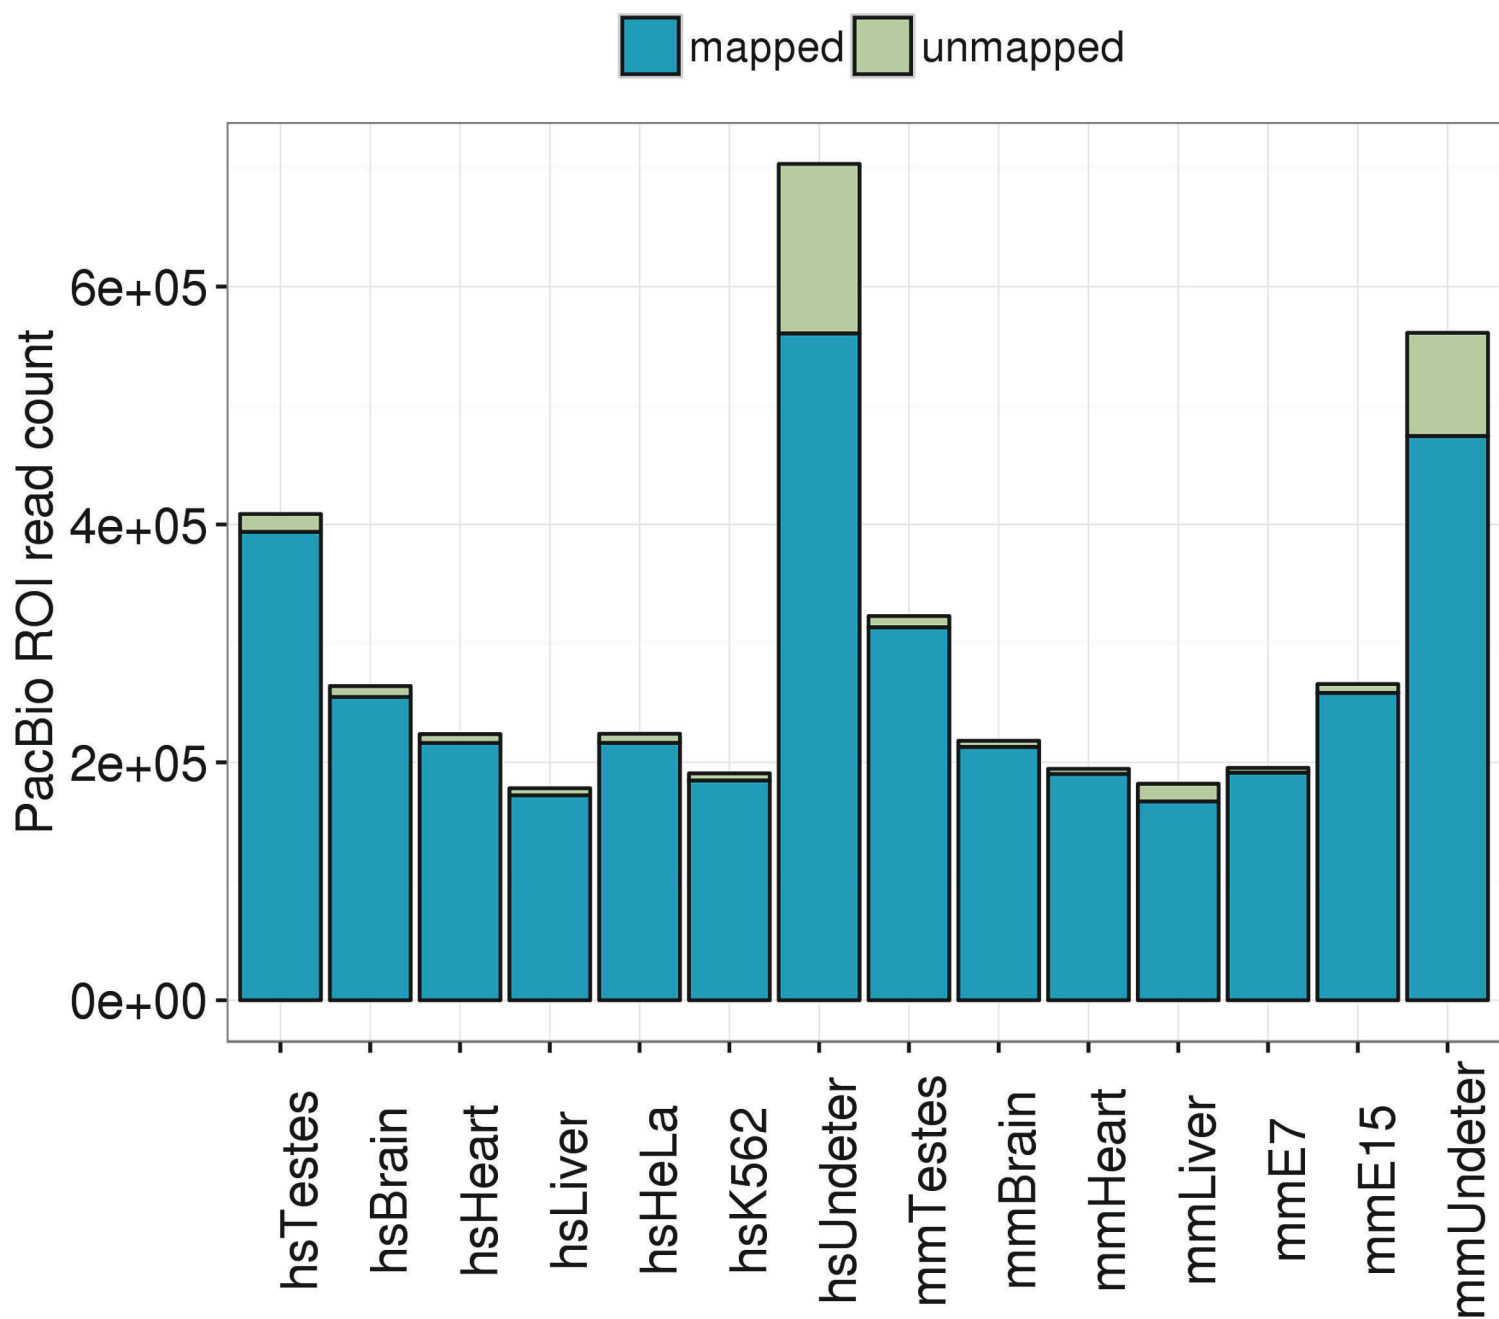

# Supplementary Figure S4

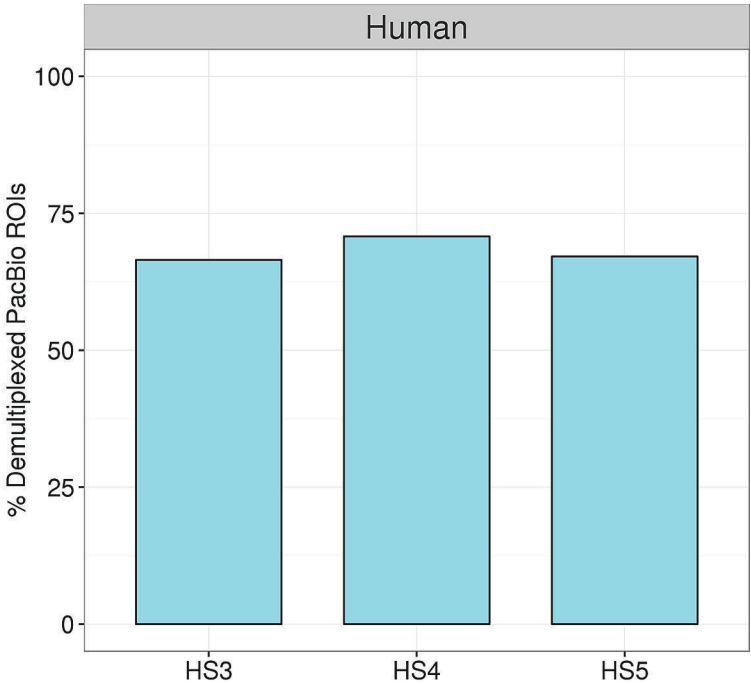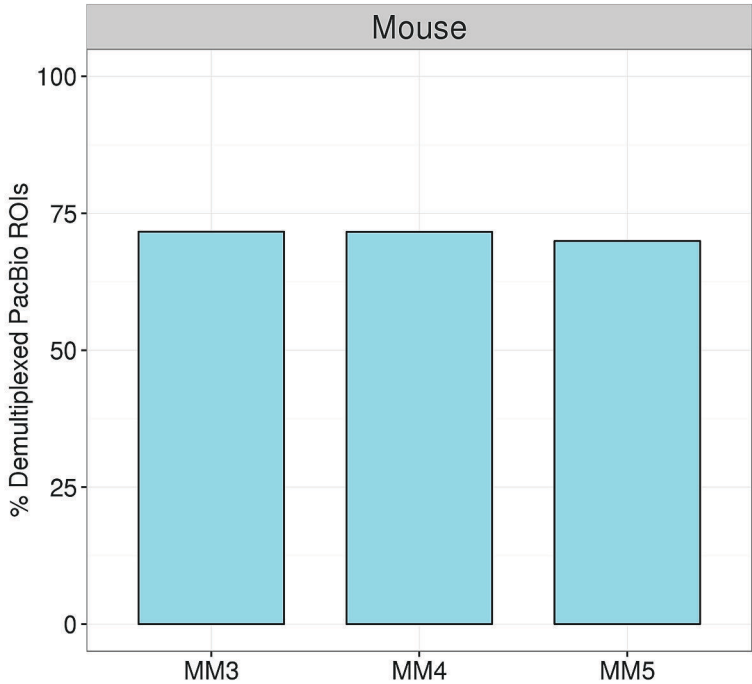



# Supplementary Figure S5

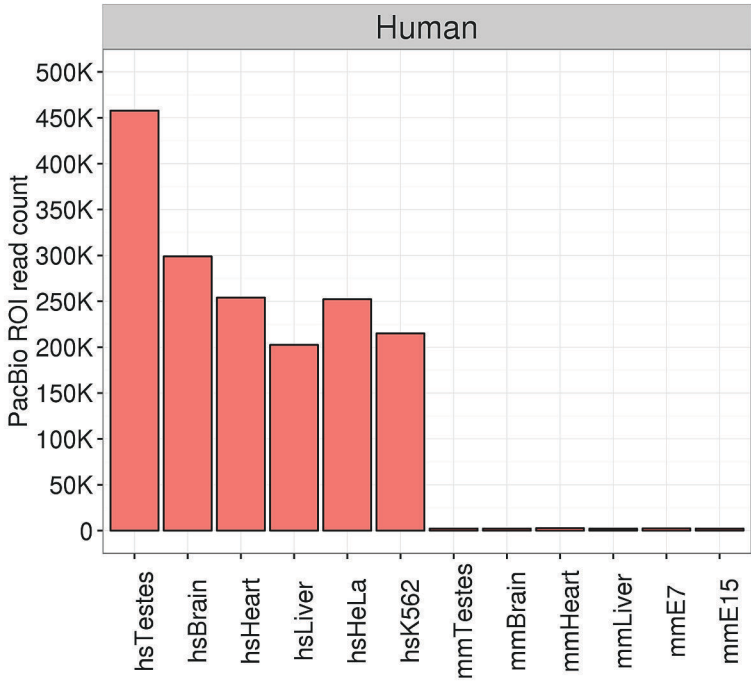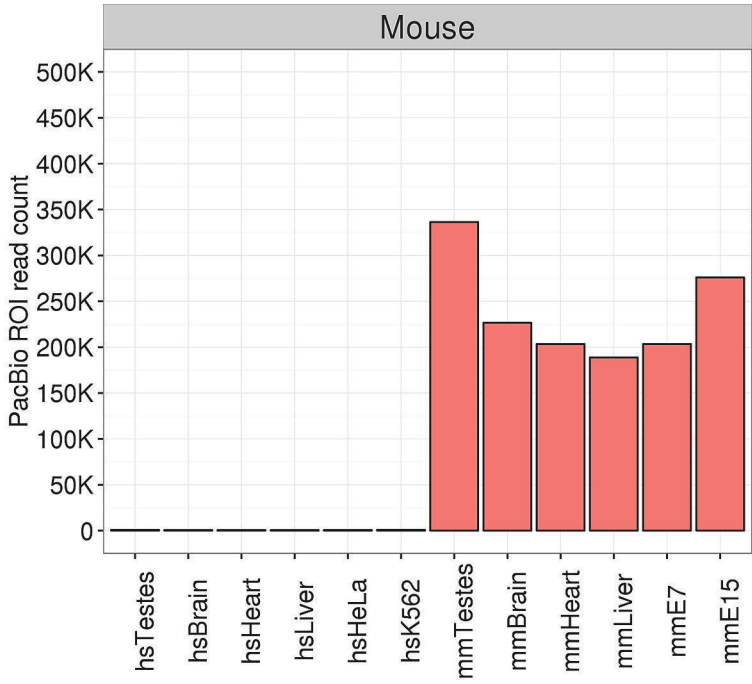

# Supplementary Figure S6

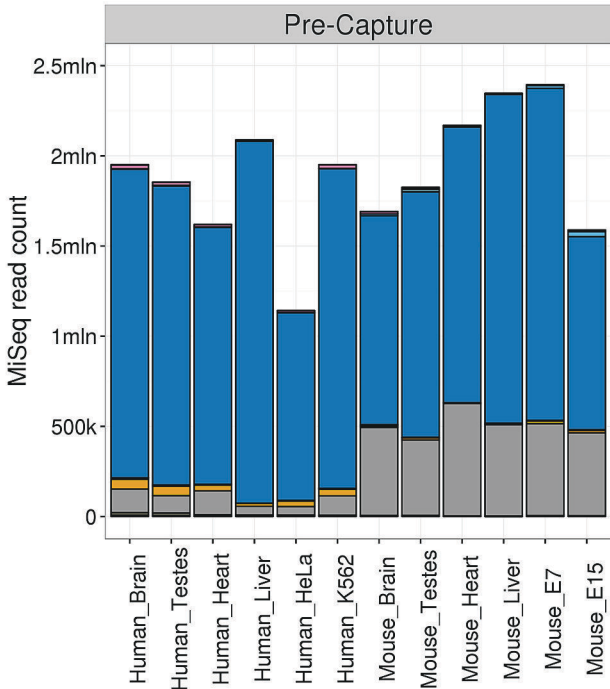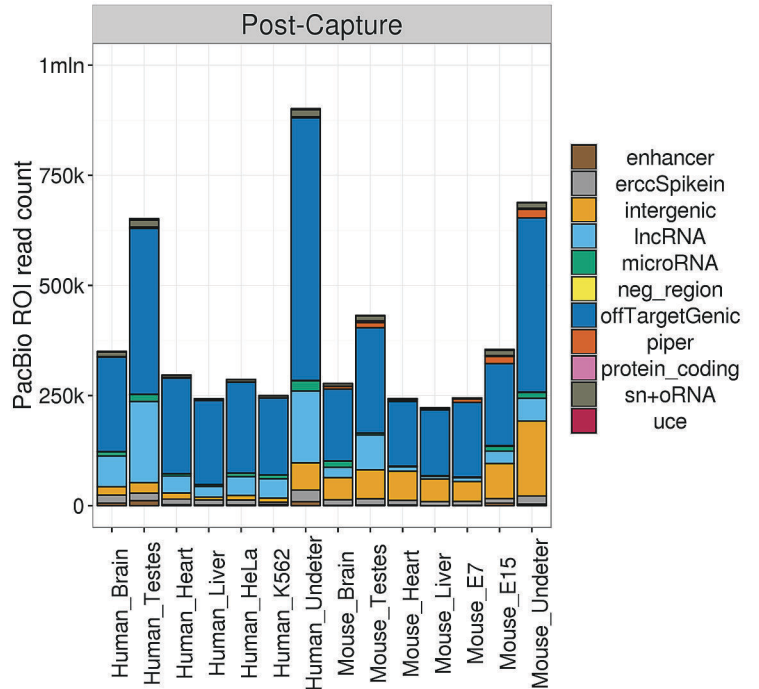

# Supplementary Figure S7

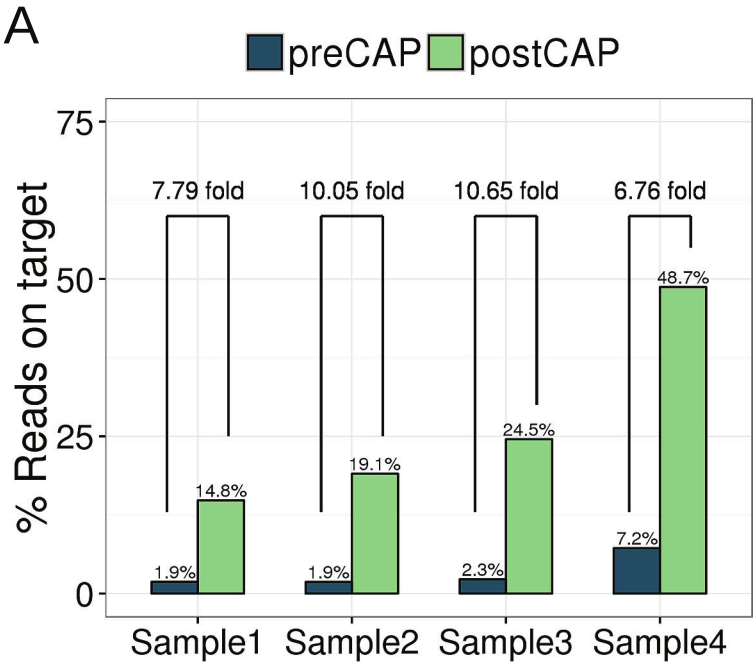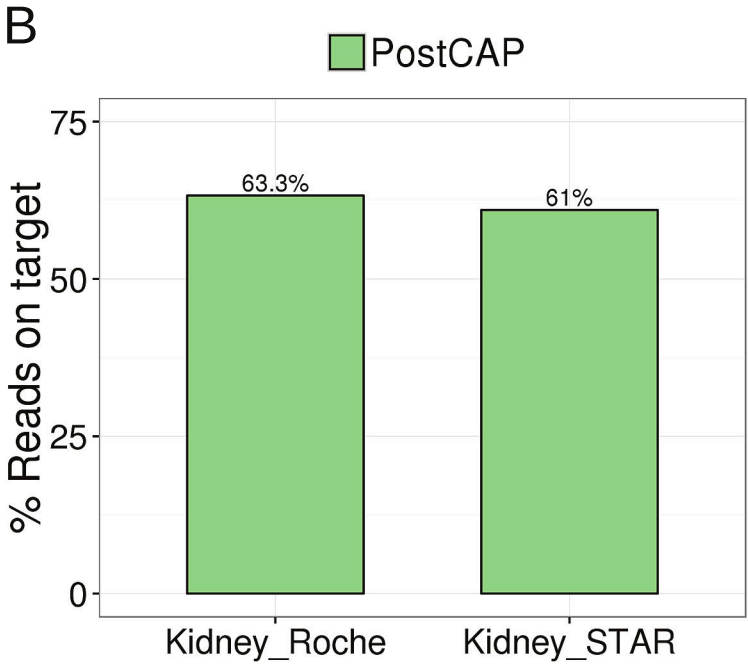

# Supplementary Figure S8

## CASC15 / ENSG00000272168

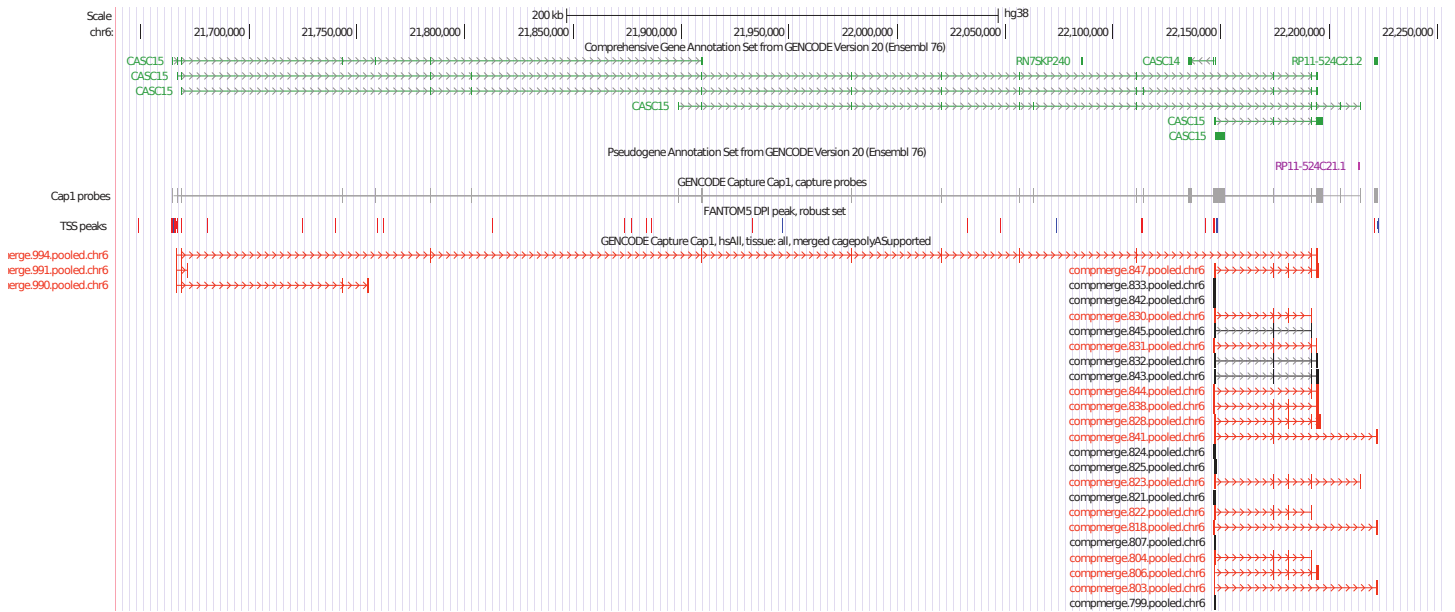

## GAS5 / ENSG00000234741

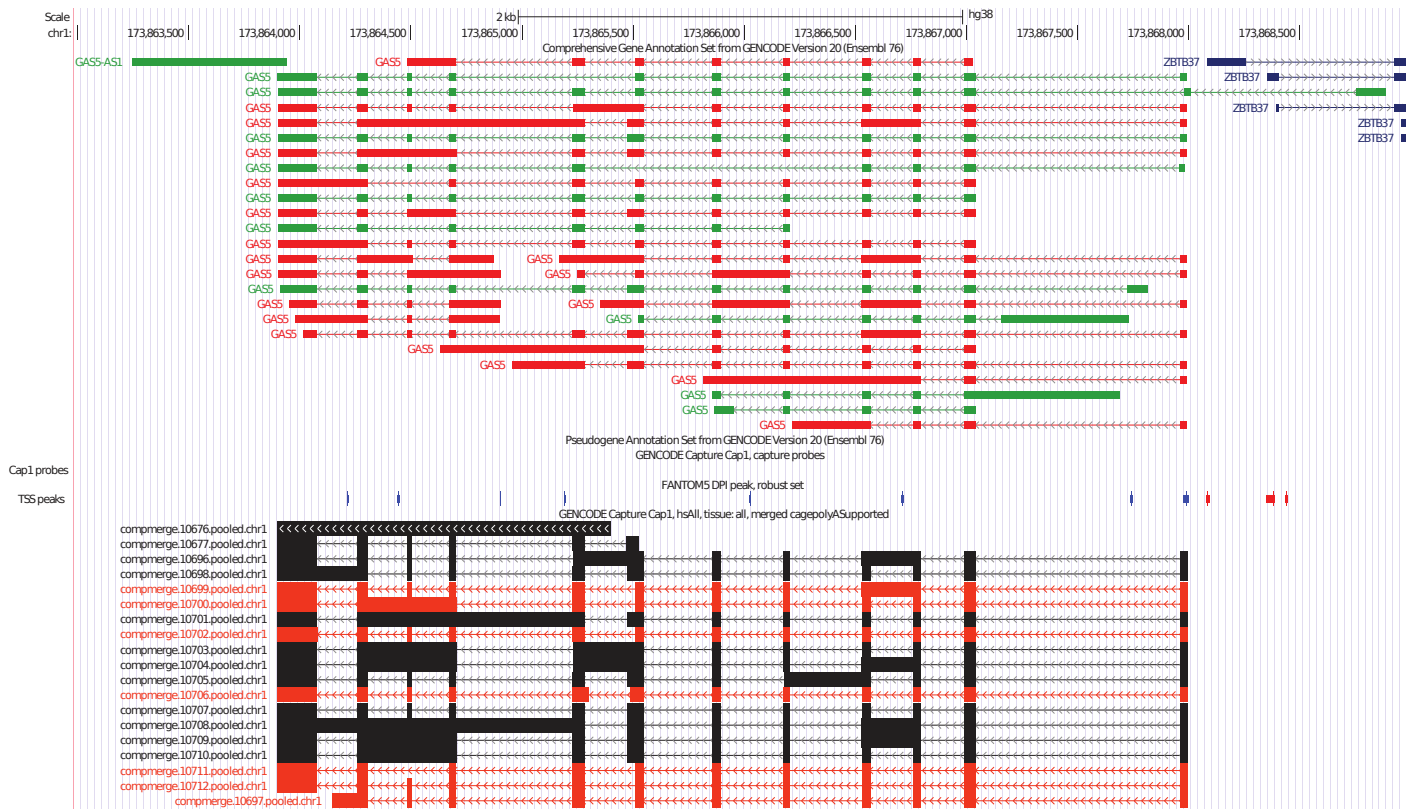

# Supplementary Figure S9

LINC01133 / ENSG00000224259

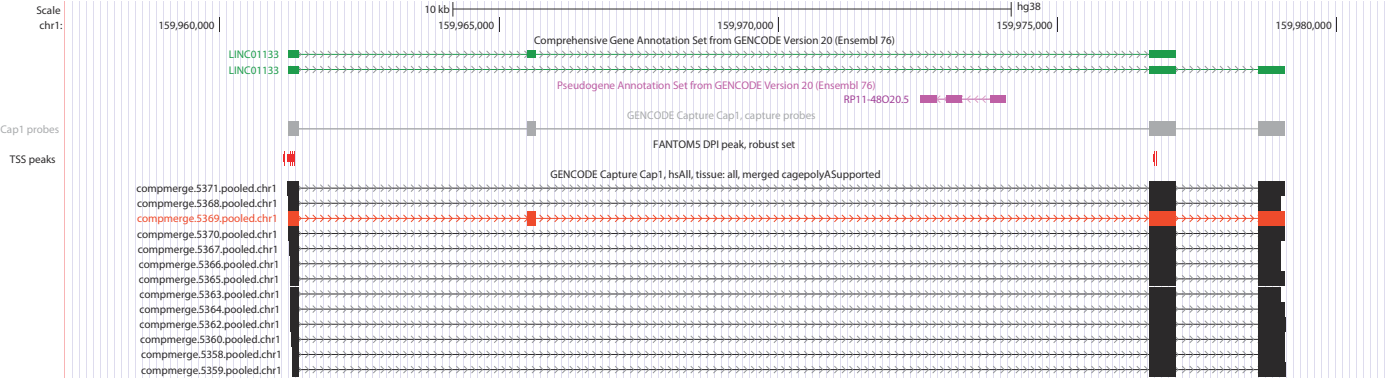

# Supplementary Figure S10

UCA1 / ENSG00000214049

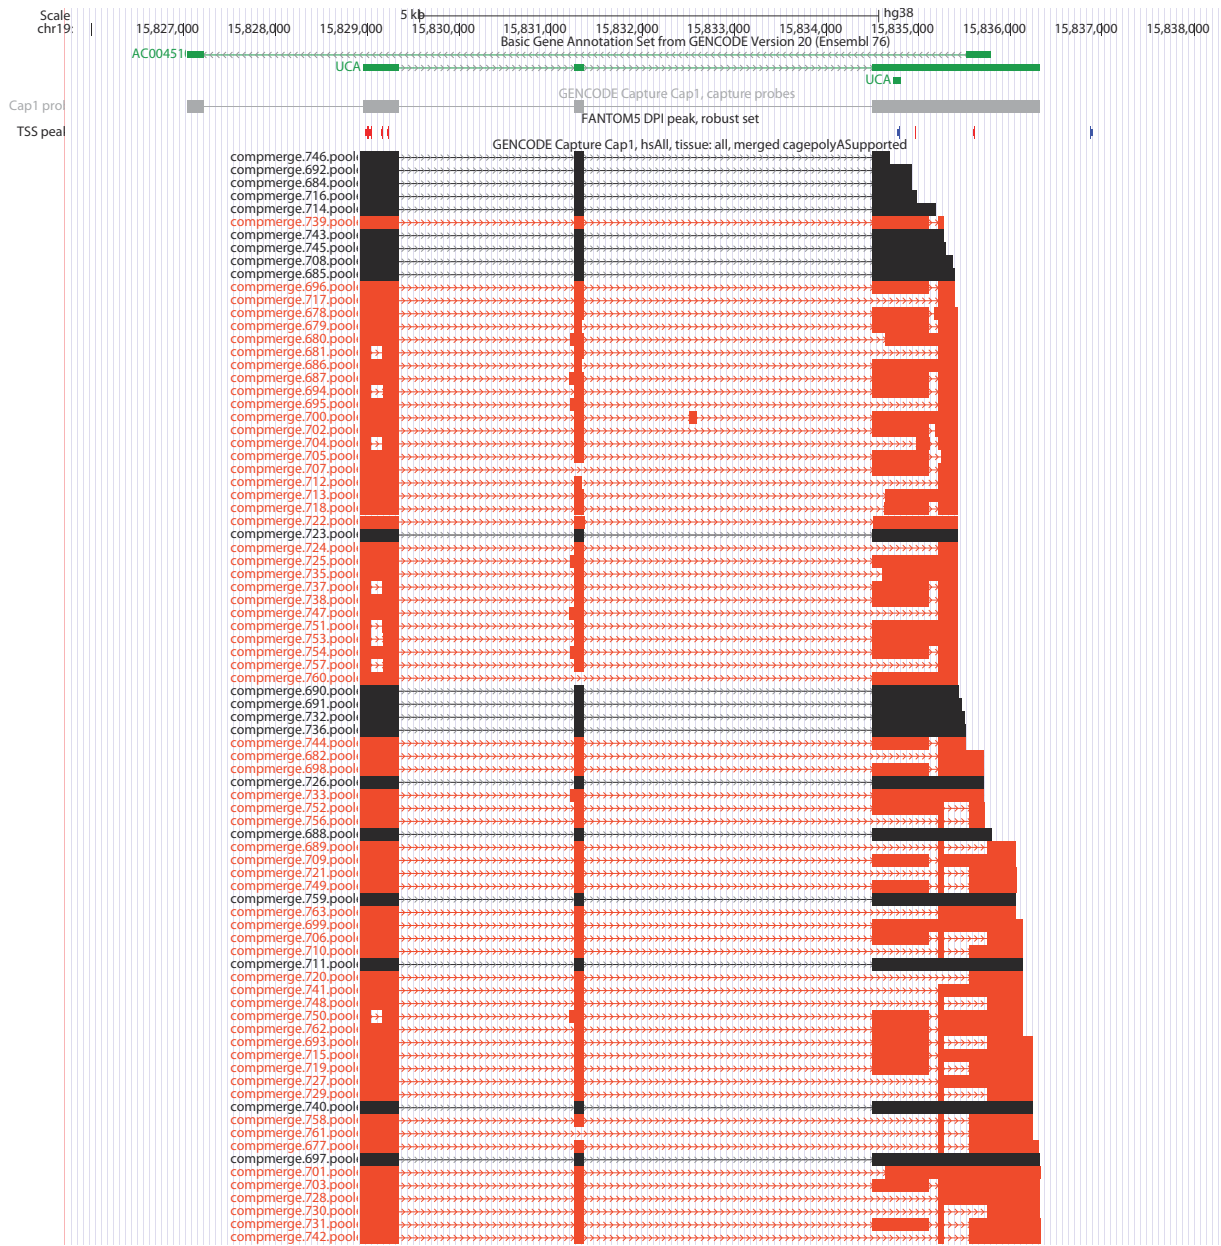

# Supplementary Figure S11

## Novel vs Annotated Exonic lncRNA Nucleotides (hs)

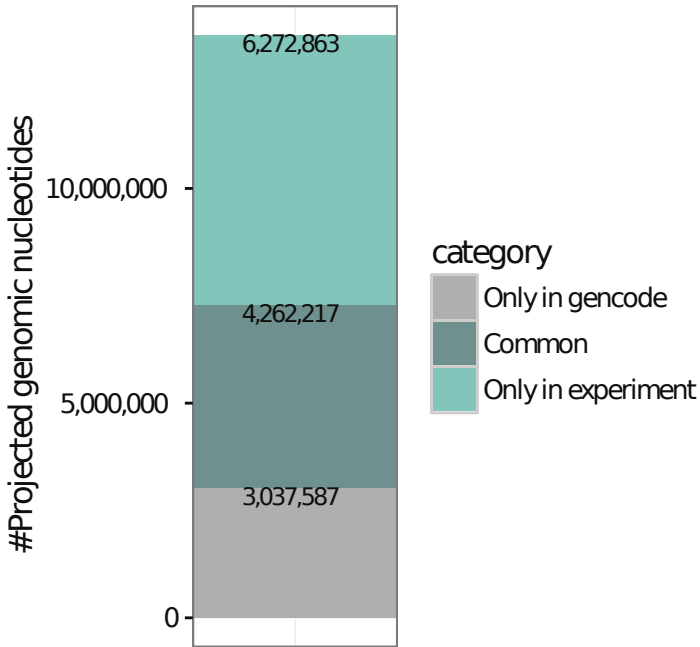

## Novel vs Annotated Exonic lncRNA Nucleotides (mm)

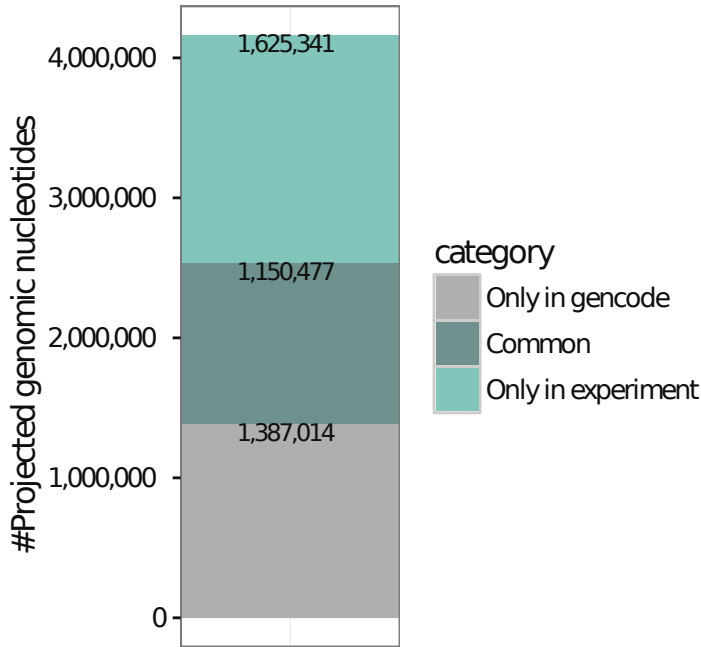

# Supplementary Figure S12

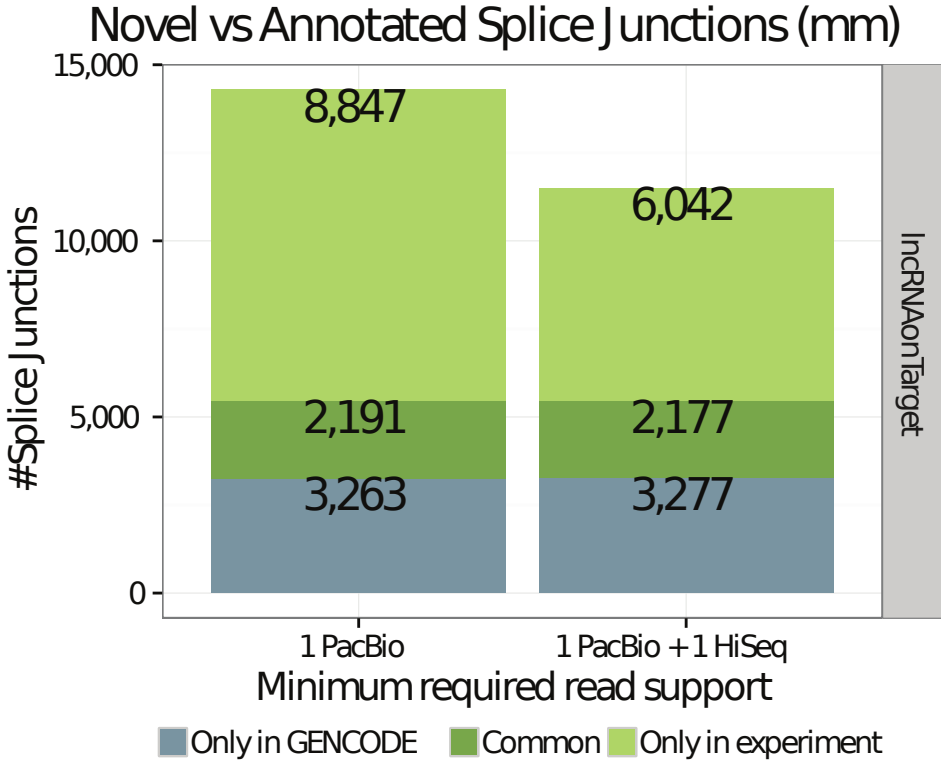



# Supplementary Figure S13

## Novel vs Annotated Splice Junctions (hs)

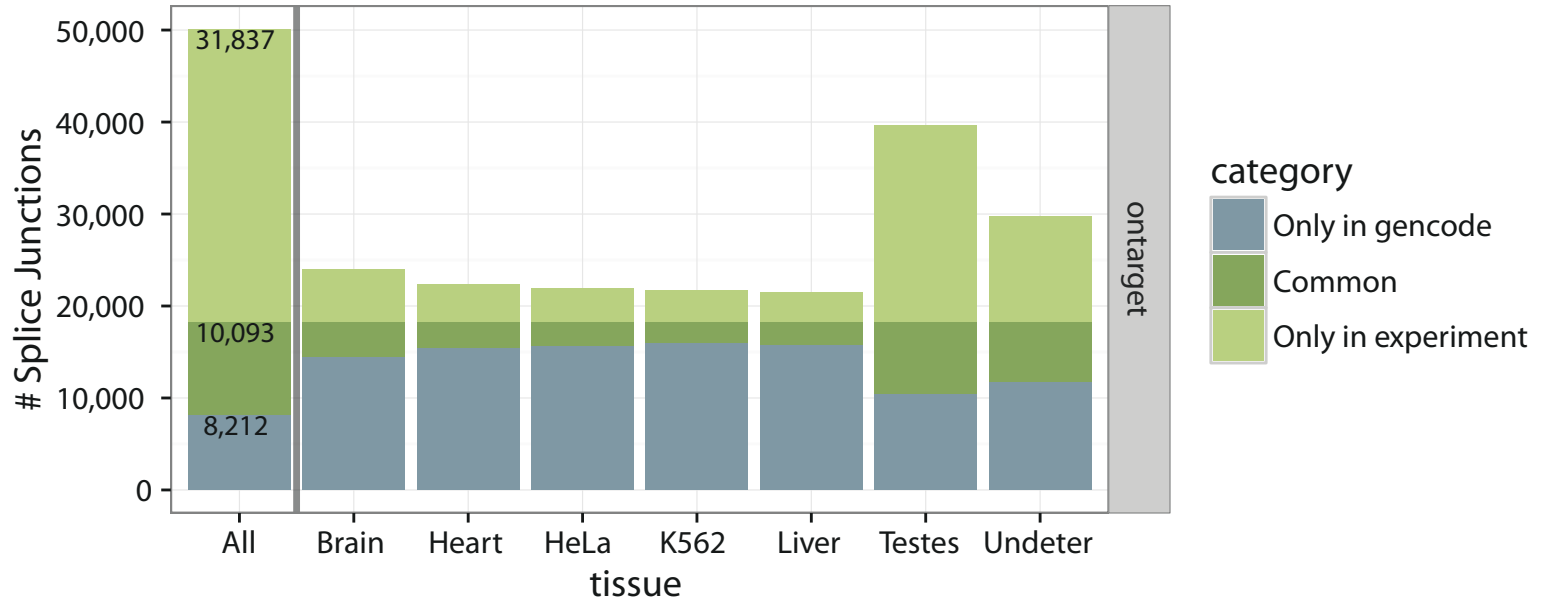

## Novel vs Annotated Splice Junctions (mm)

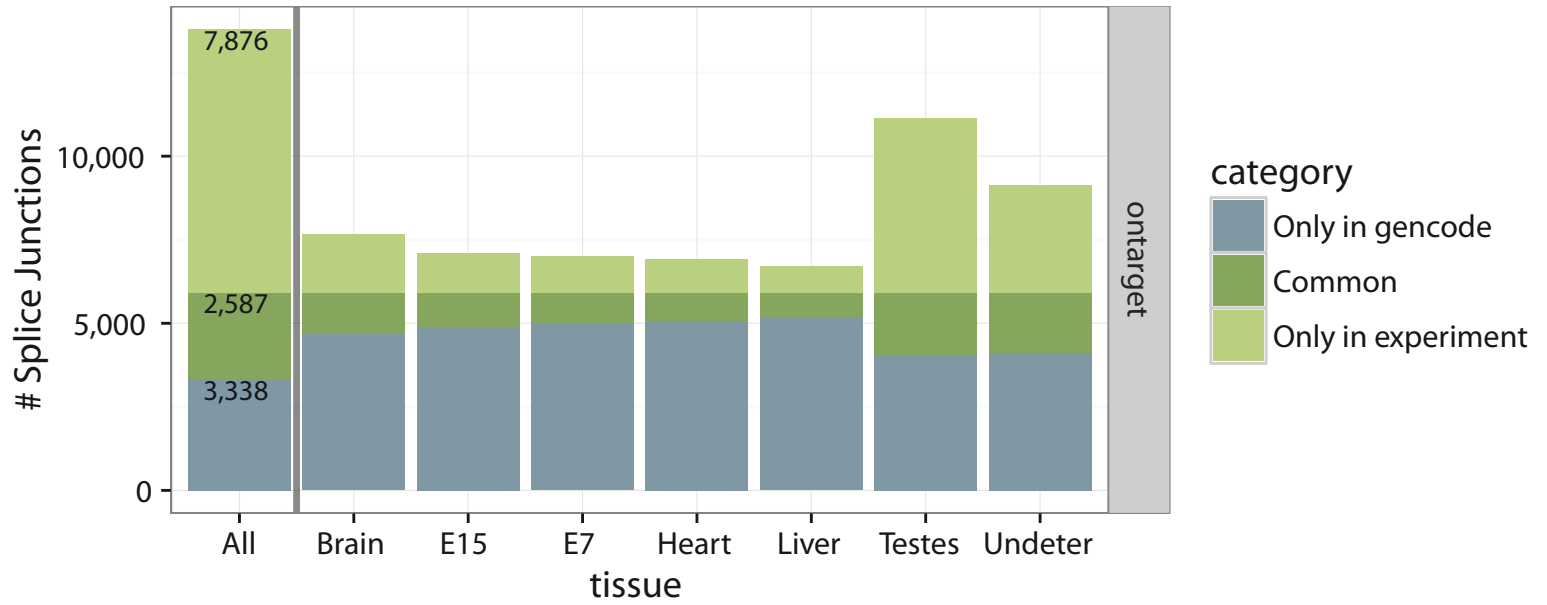

# Supplementary Figure S14

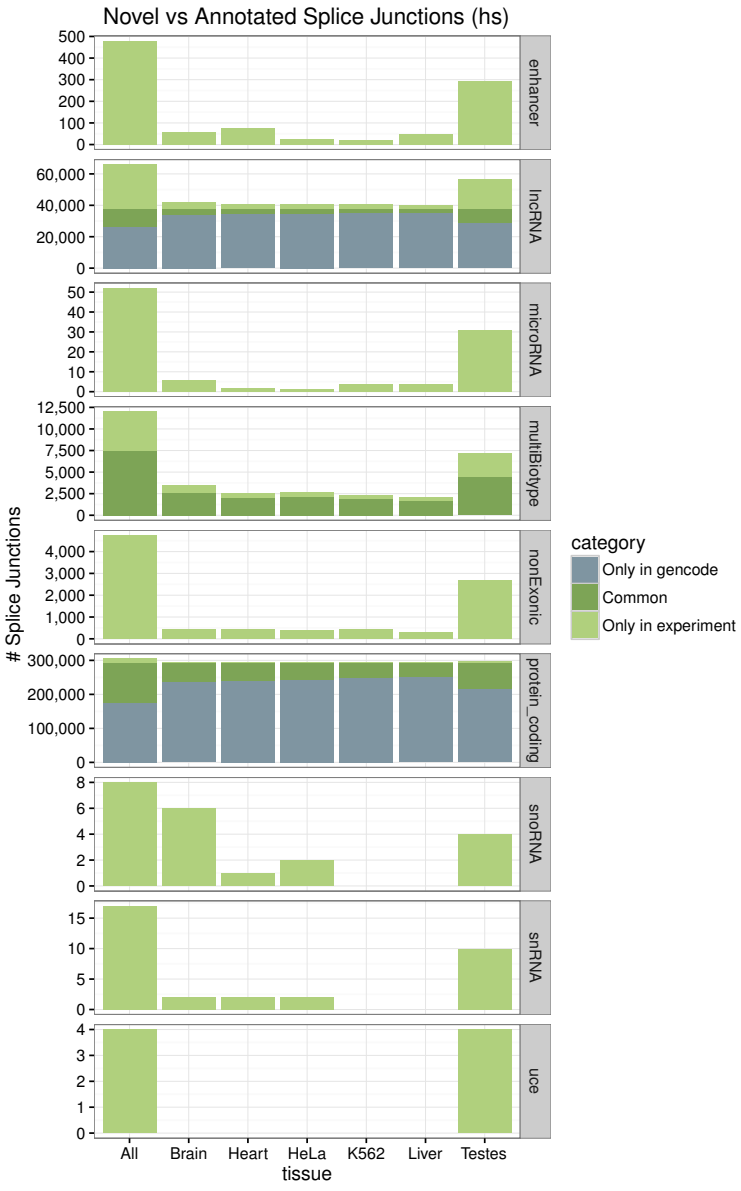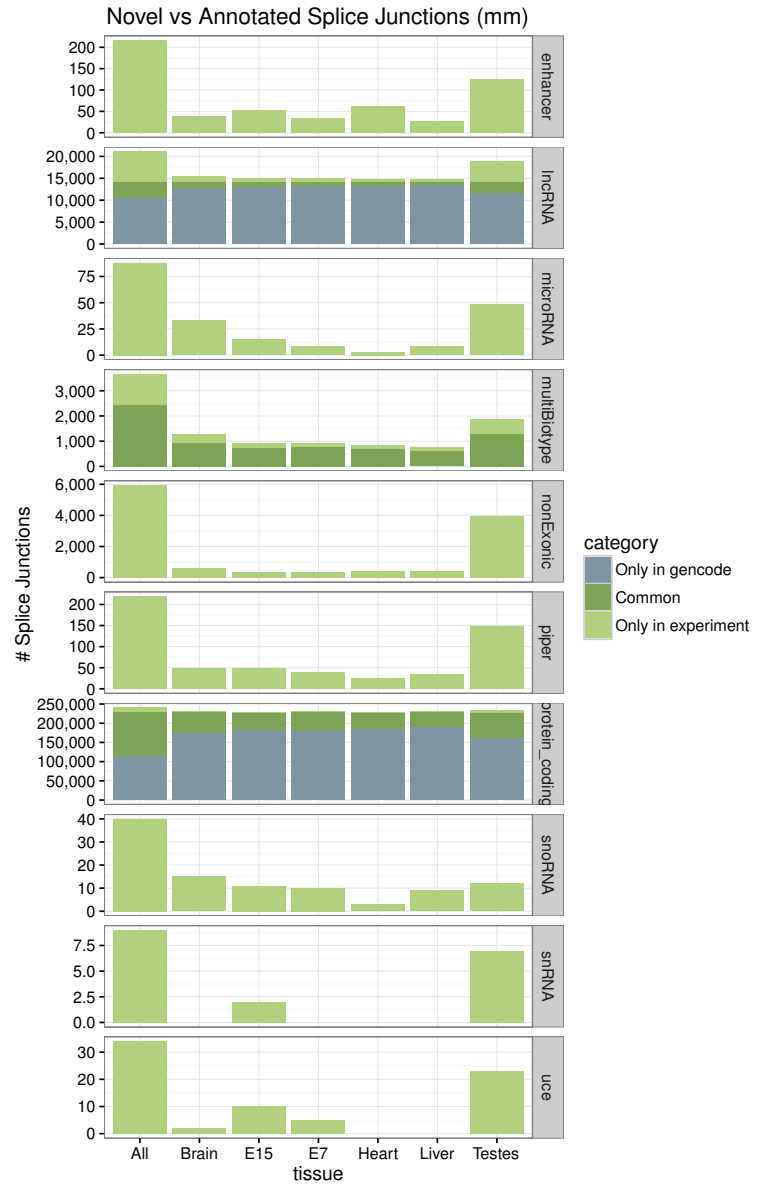

Supplementary Figure S15

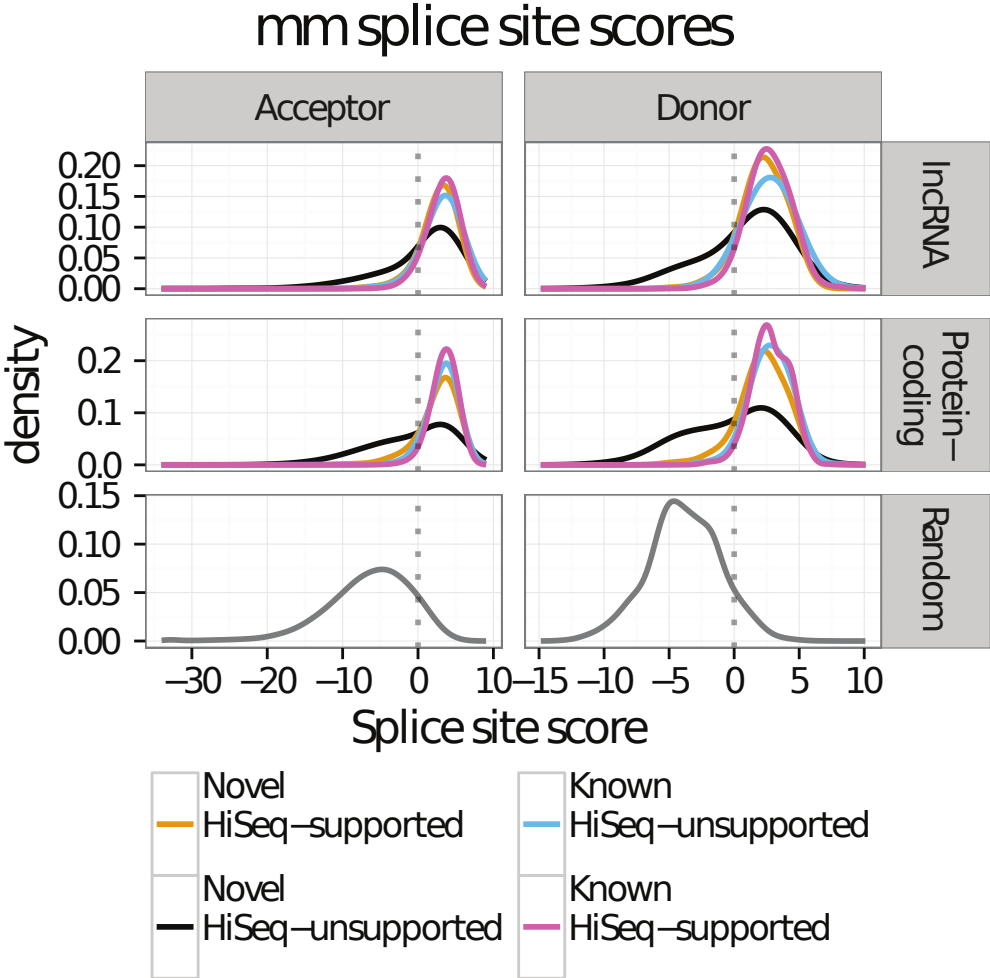

# Supplementary Figure S16

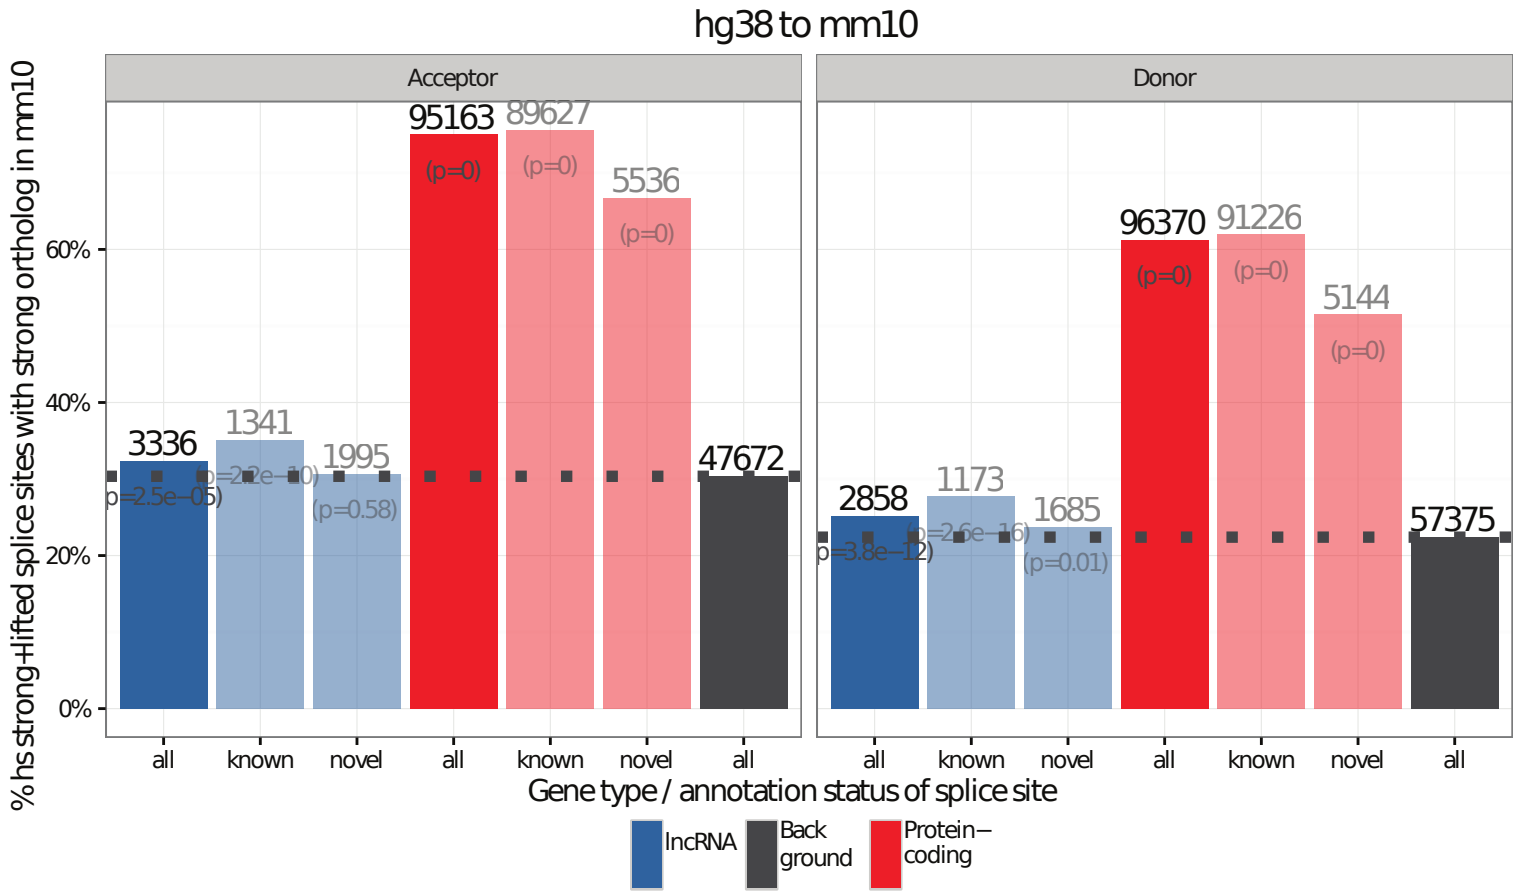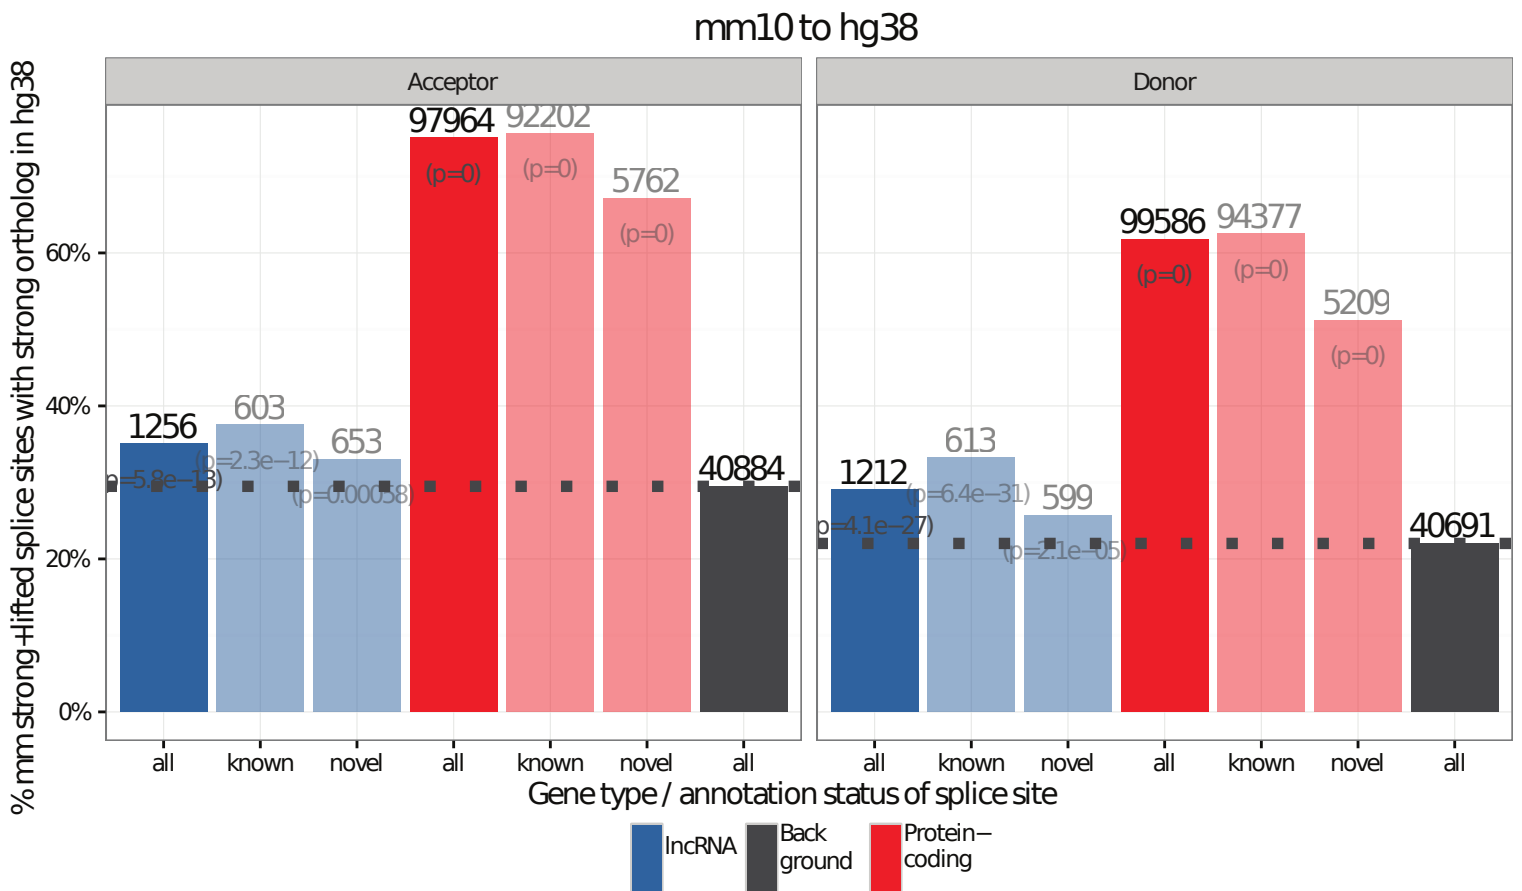

# Supplementary Figure S17

Simulated read depth vs novel splice junction discovery (mm)

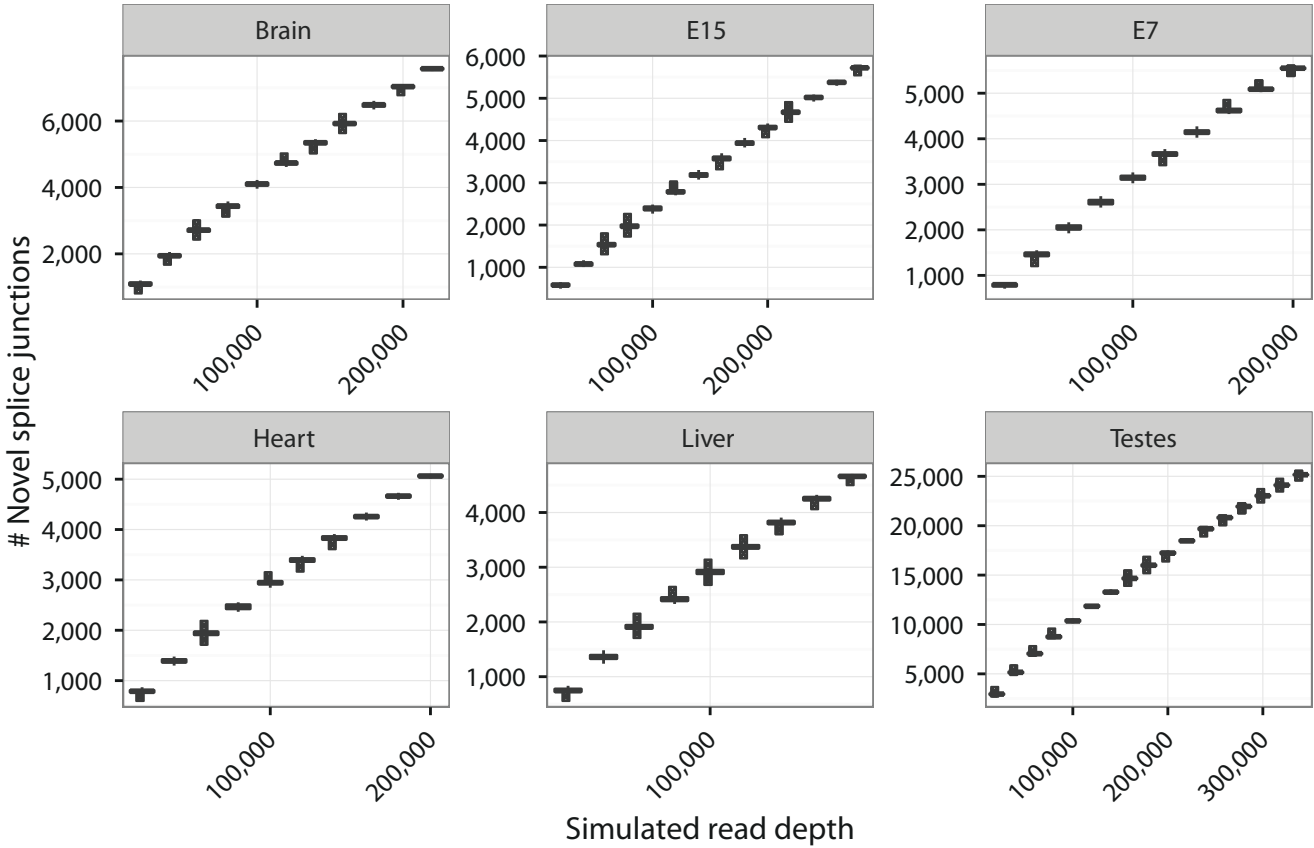

# Supplementary Figure S18

## Simulated read depth vs novel transcript discovery (hs)

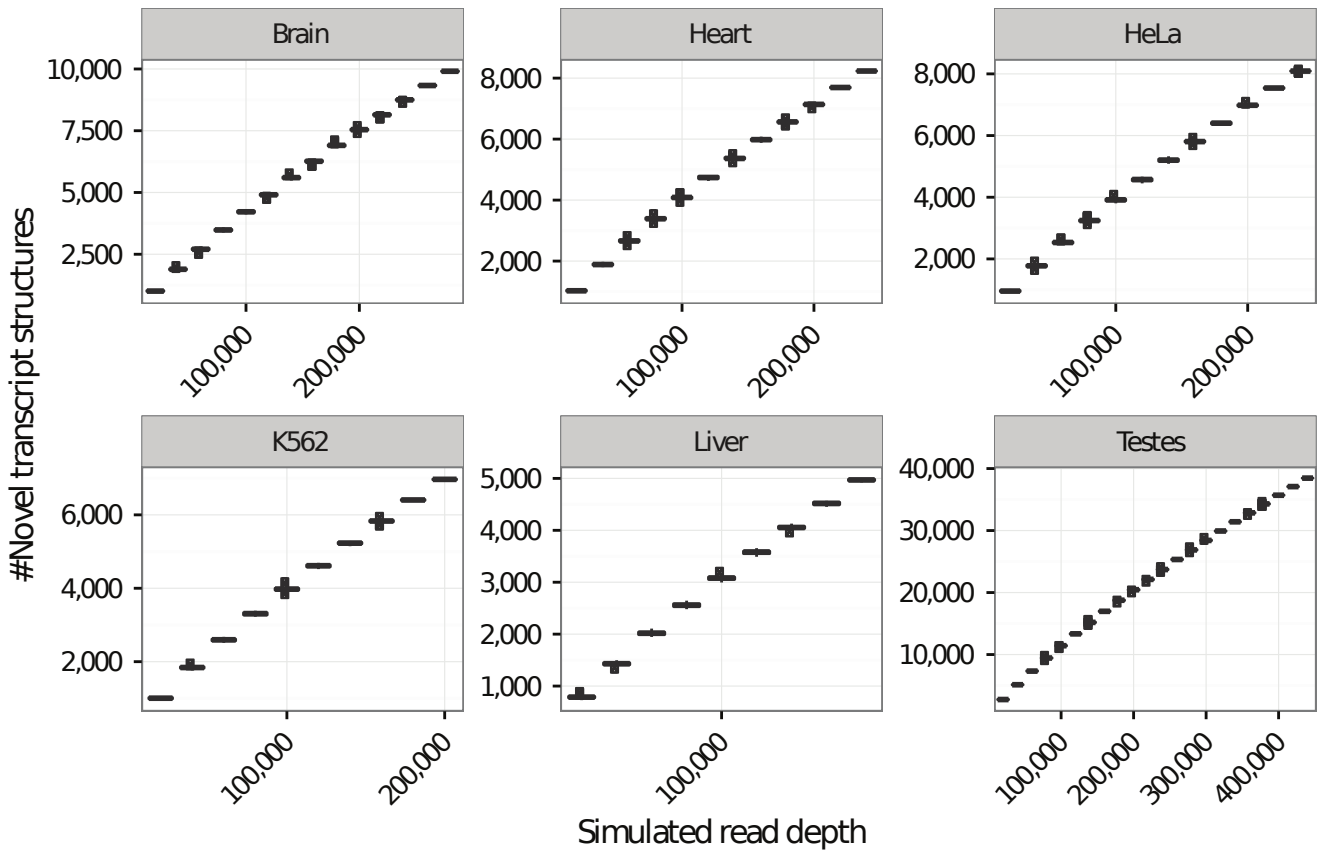

## Simulated read depth vs novel transcript discovery (mm)

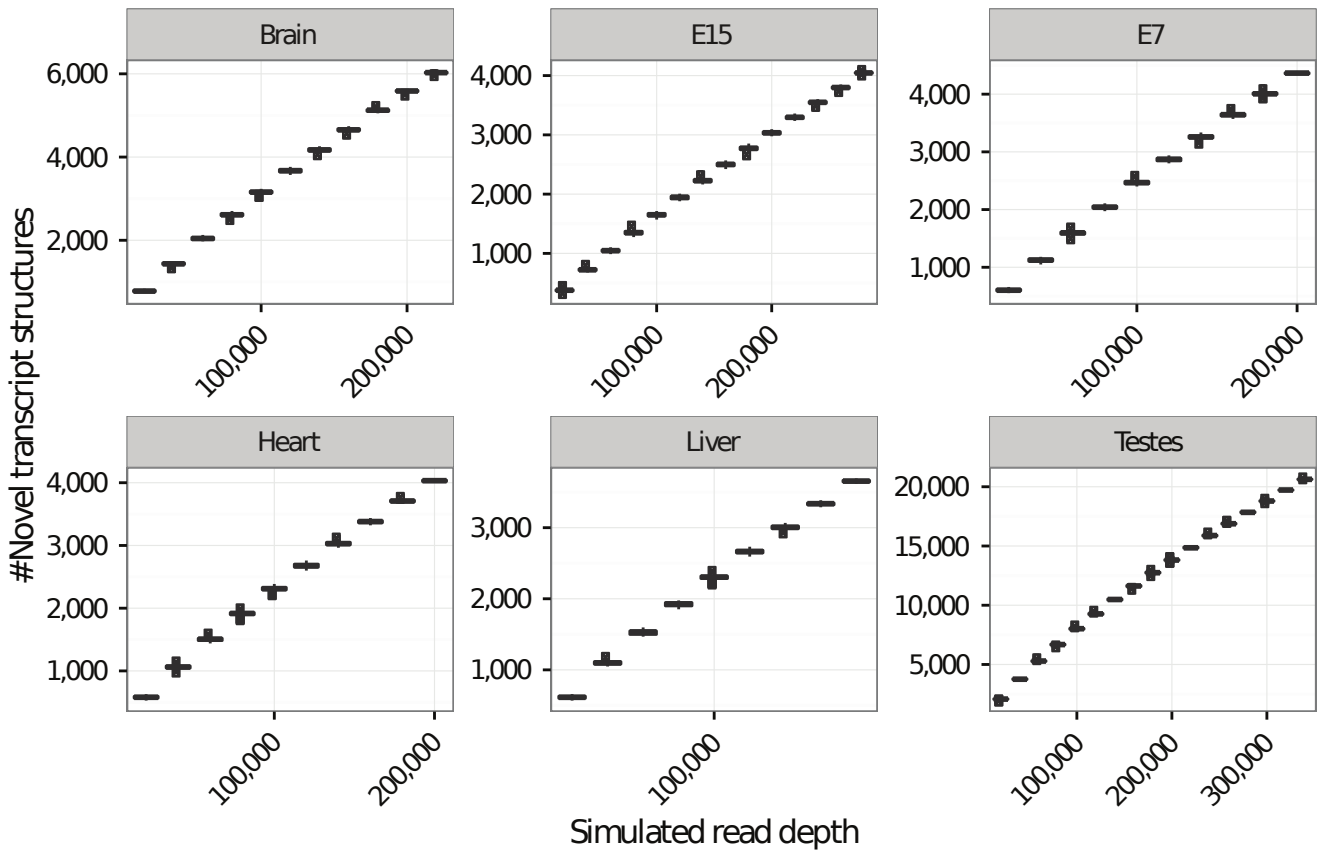



# Supplementary Figure S20

A

- Canonical polyA signals:**
- AACAAA
  - AATAAA**
  - AATACA
  - AATAGA
  - AATATA
  - AATGAA
  - ACTAAA
  - AGTAAA
  - ATTAAT**
  - CATAAA
  - GATAAA
  - TATAAA
  - TTTAAA

B

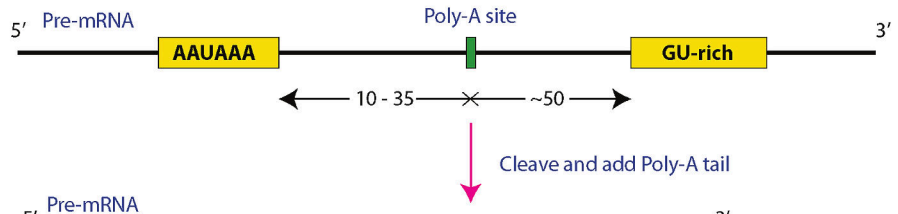

C

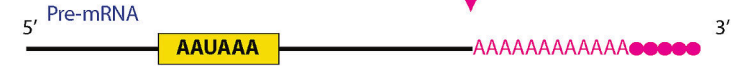

| Species | Set                 | Total # sites | # Sites with Poly-A signal upstream (-10 to -50 nts) | % Sites with Poly-A signal upstream (-10 to -50 nts) |
|---------|---------------------|---------------|------------------------------------------------------|------------------------------------------------------|
| Human   | <b>Poly-A sites</b> | 35,092        | 30,301                                               | <b>86%</b>                                           |
|         | Control             | 203,303       | 30,519                                               | 15%                                                  |
| Mouse   | <b>Poly-A sites</b> | 27,152        | 23,249                                               | <b>86%</b>                                           |
|         | Control             | 175,240       | 20,423                                               | 12%                                                  |

D

Human

Mouse

Motif upstream No motif upstream

Motif upstream No motif upstream

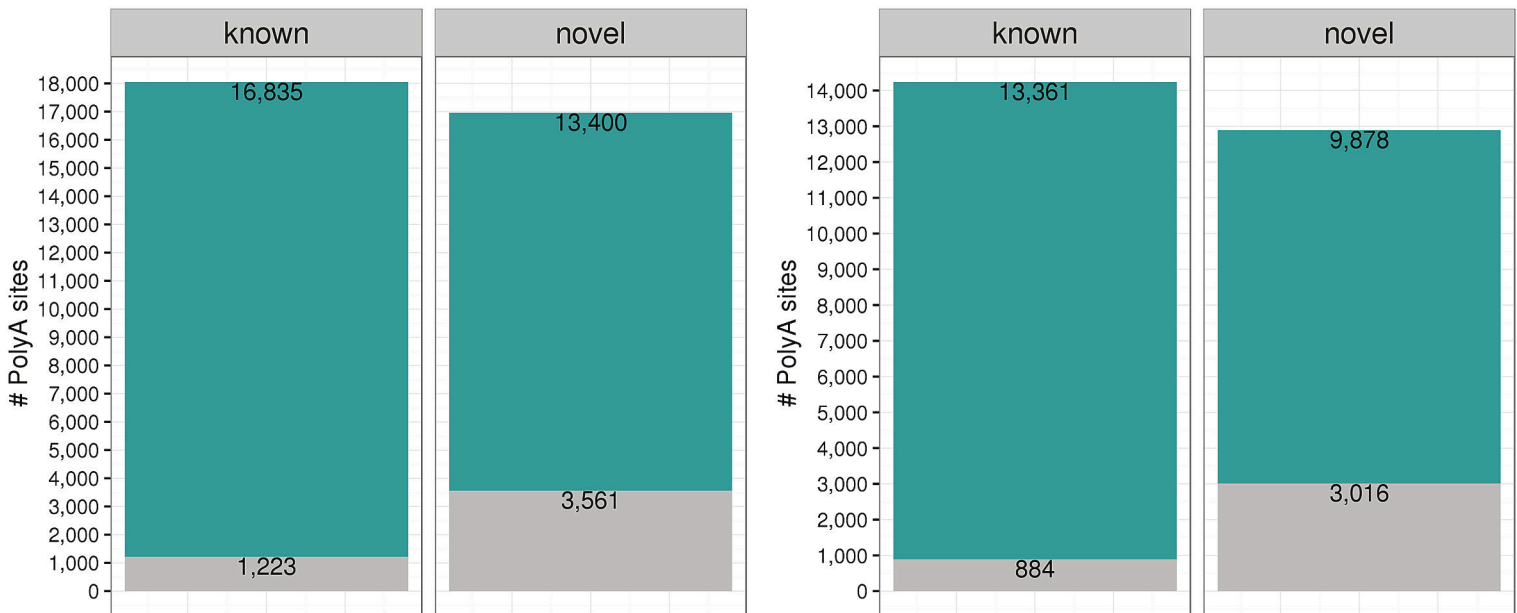



# Supplementary Figure S21

## Human

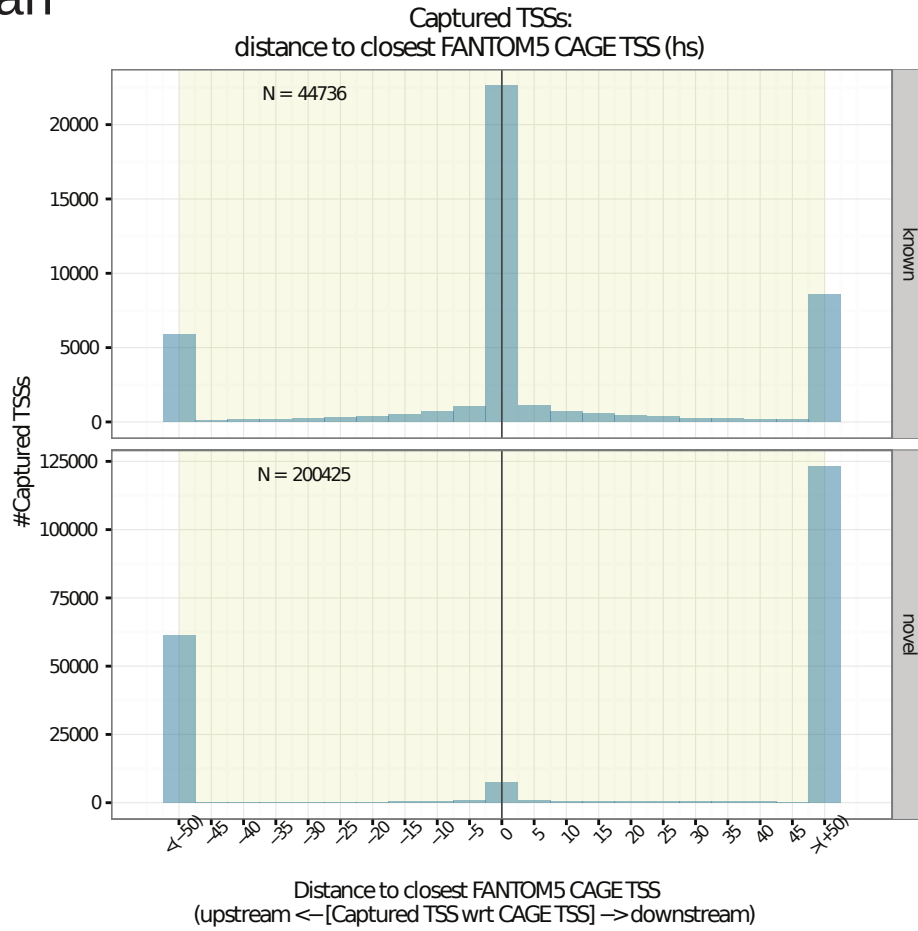

## Mouse

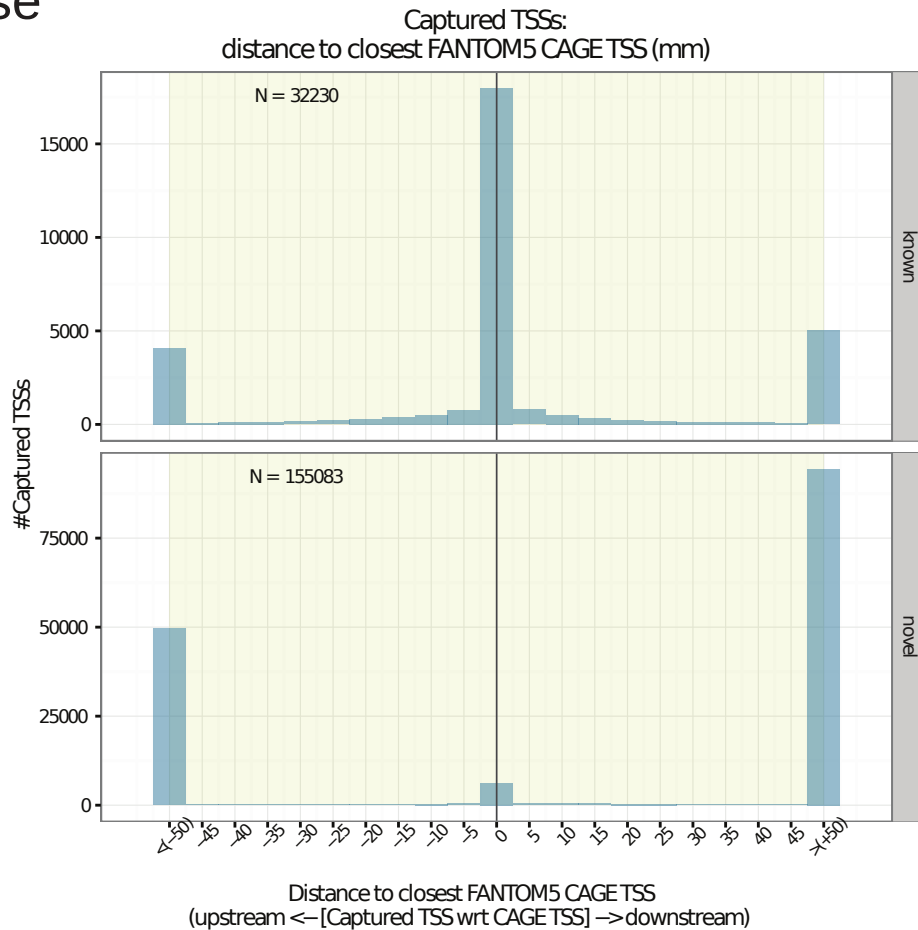

# Supplementary Figure S22

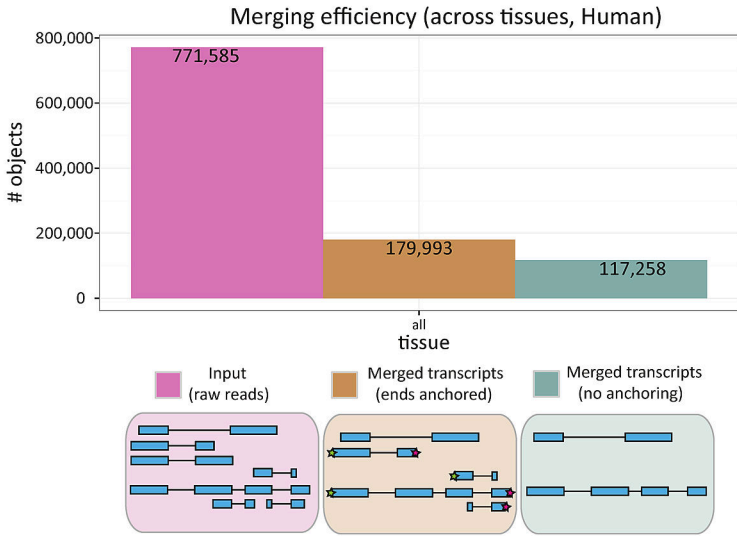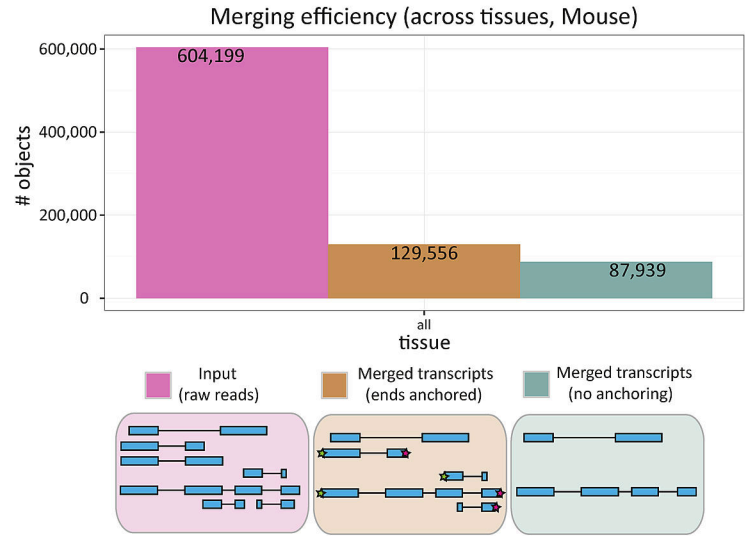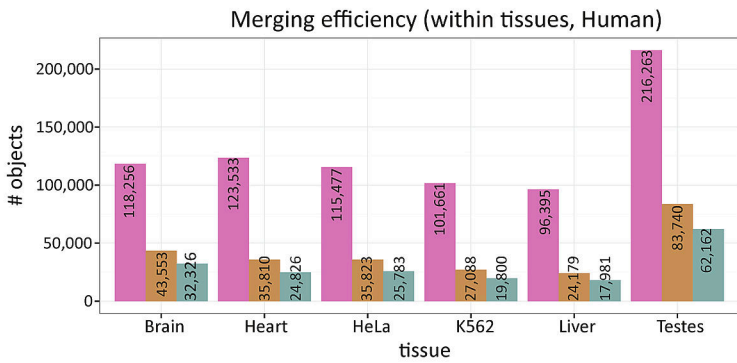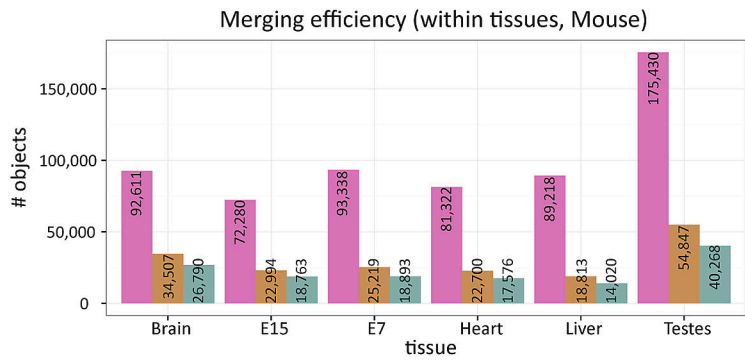

Supplementary Figure S23

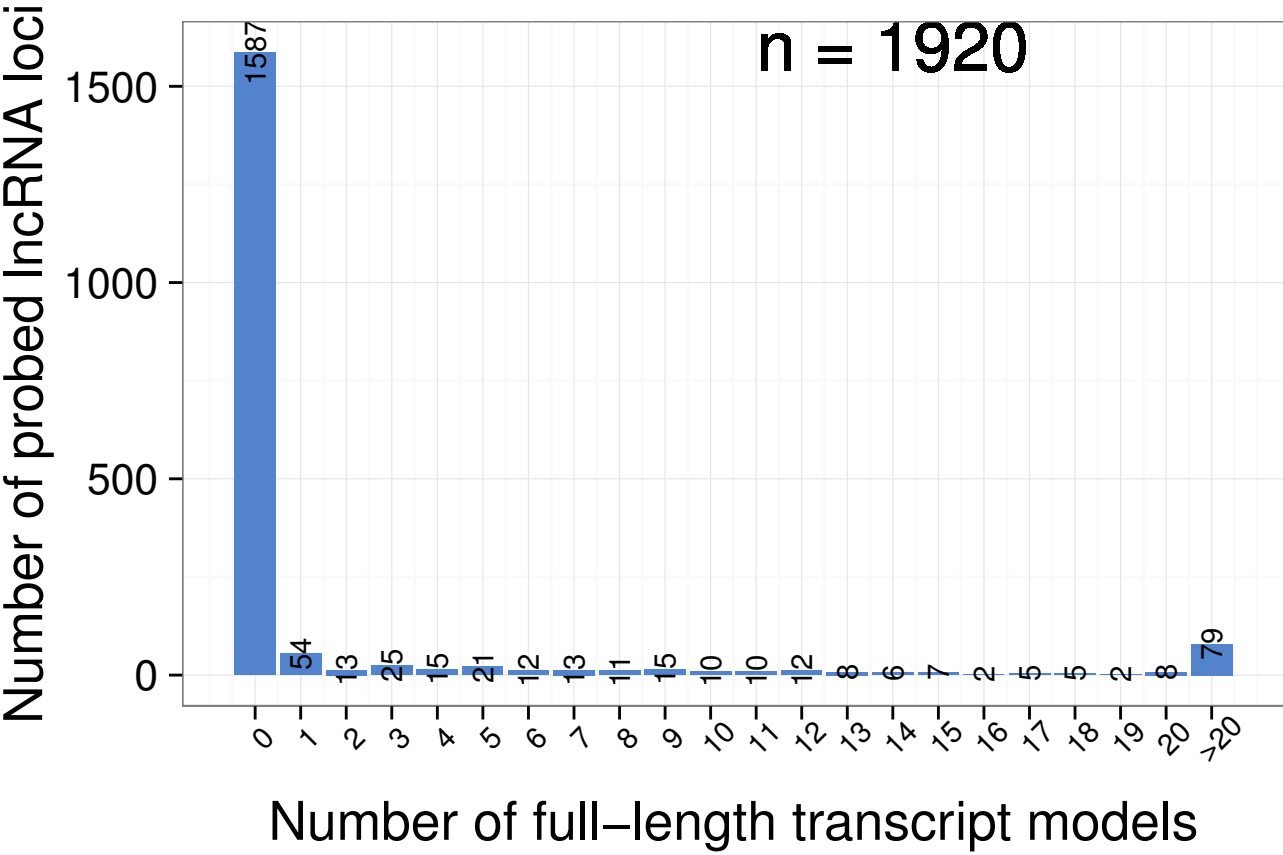

# Supplementary Figure S24

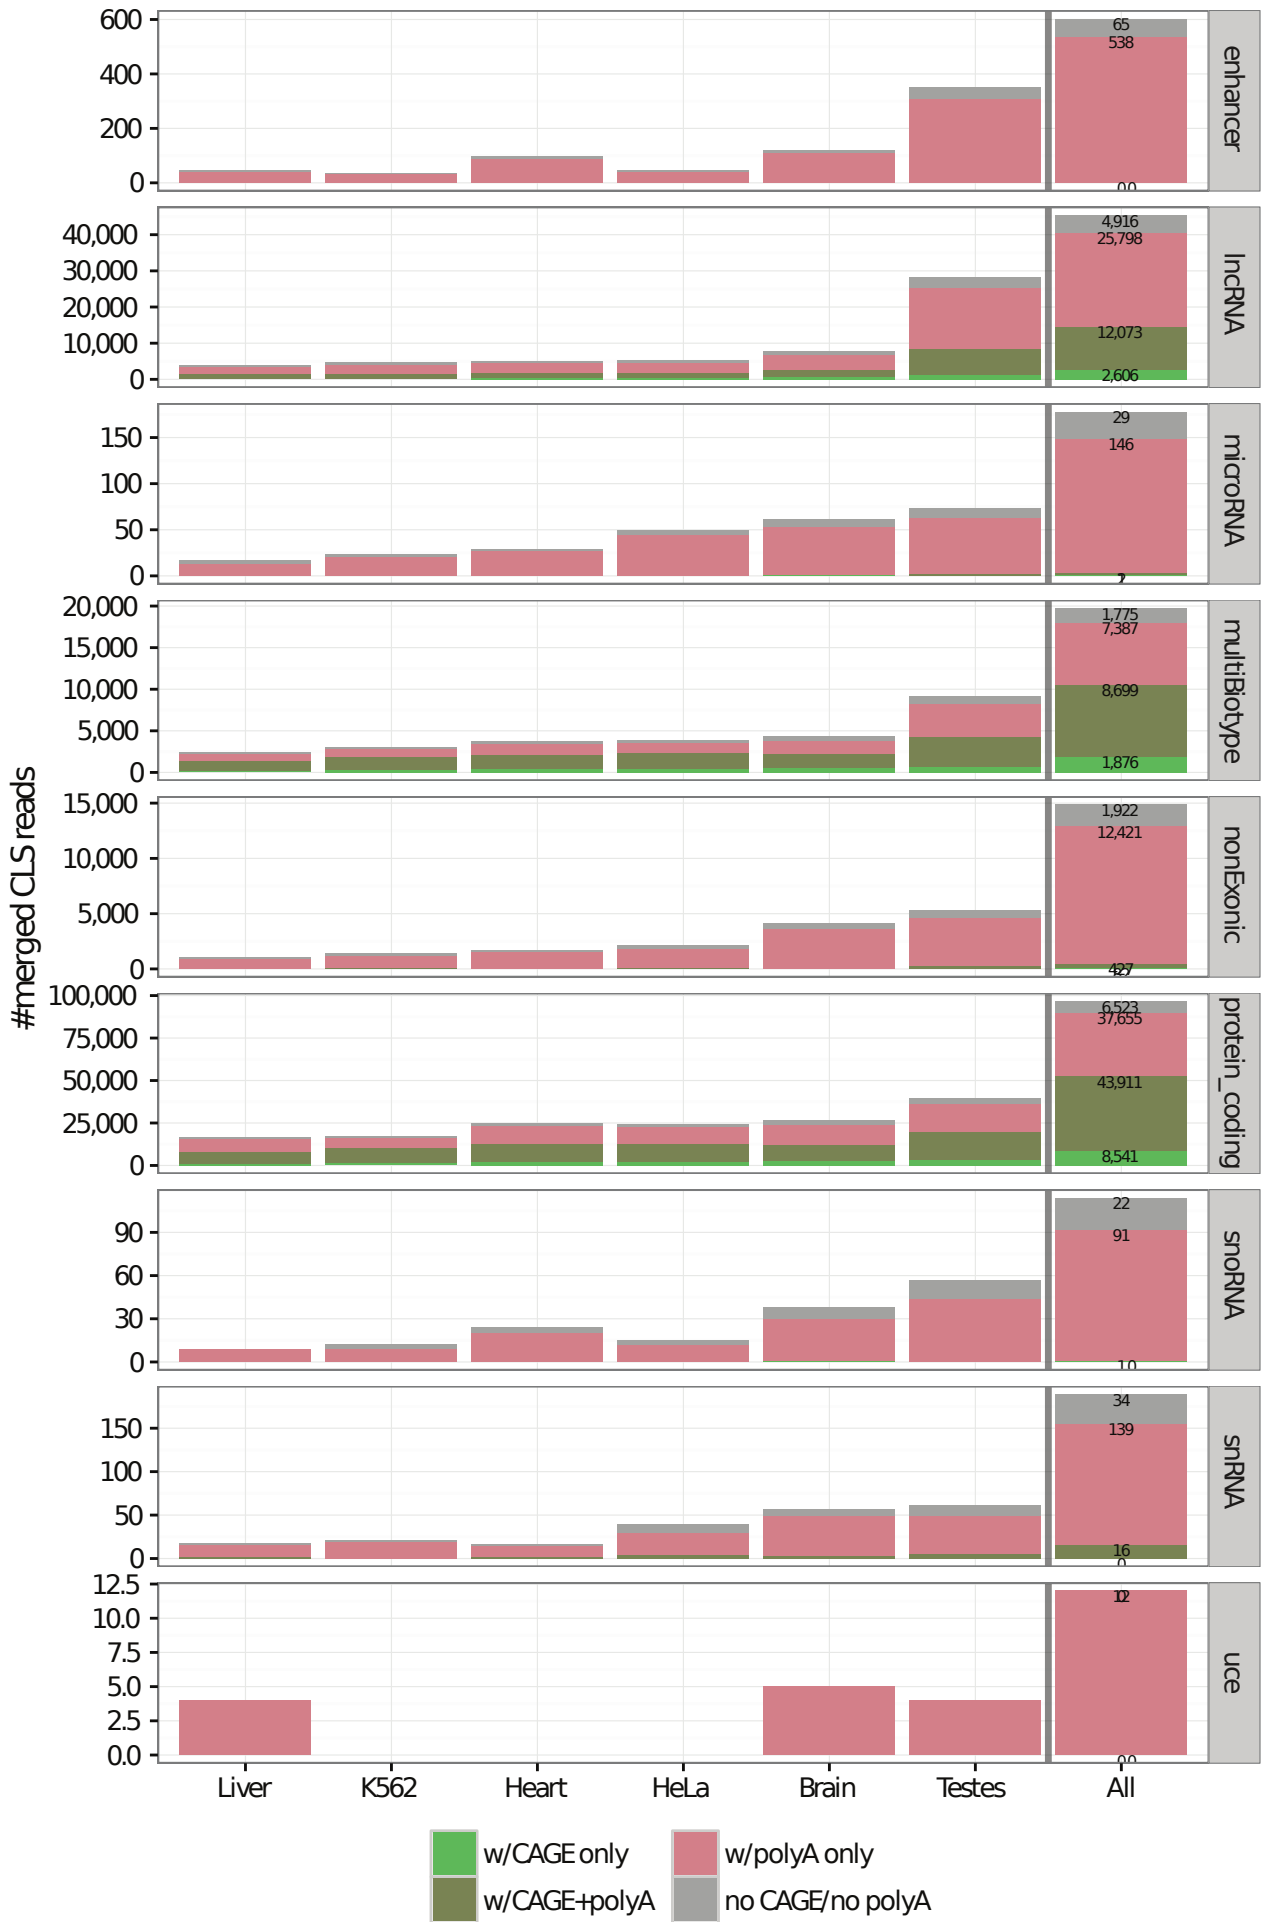

# Supplementary Figure S25

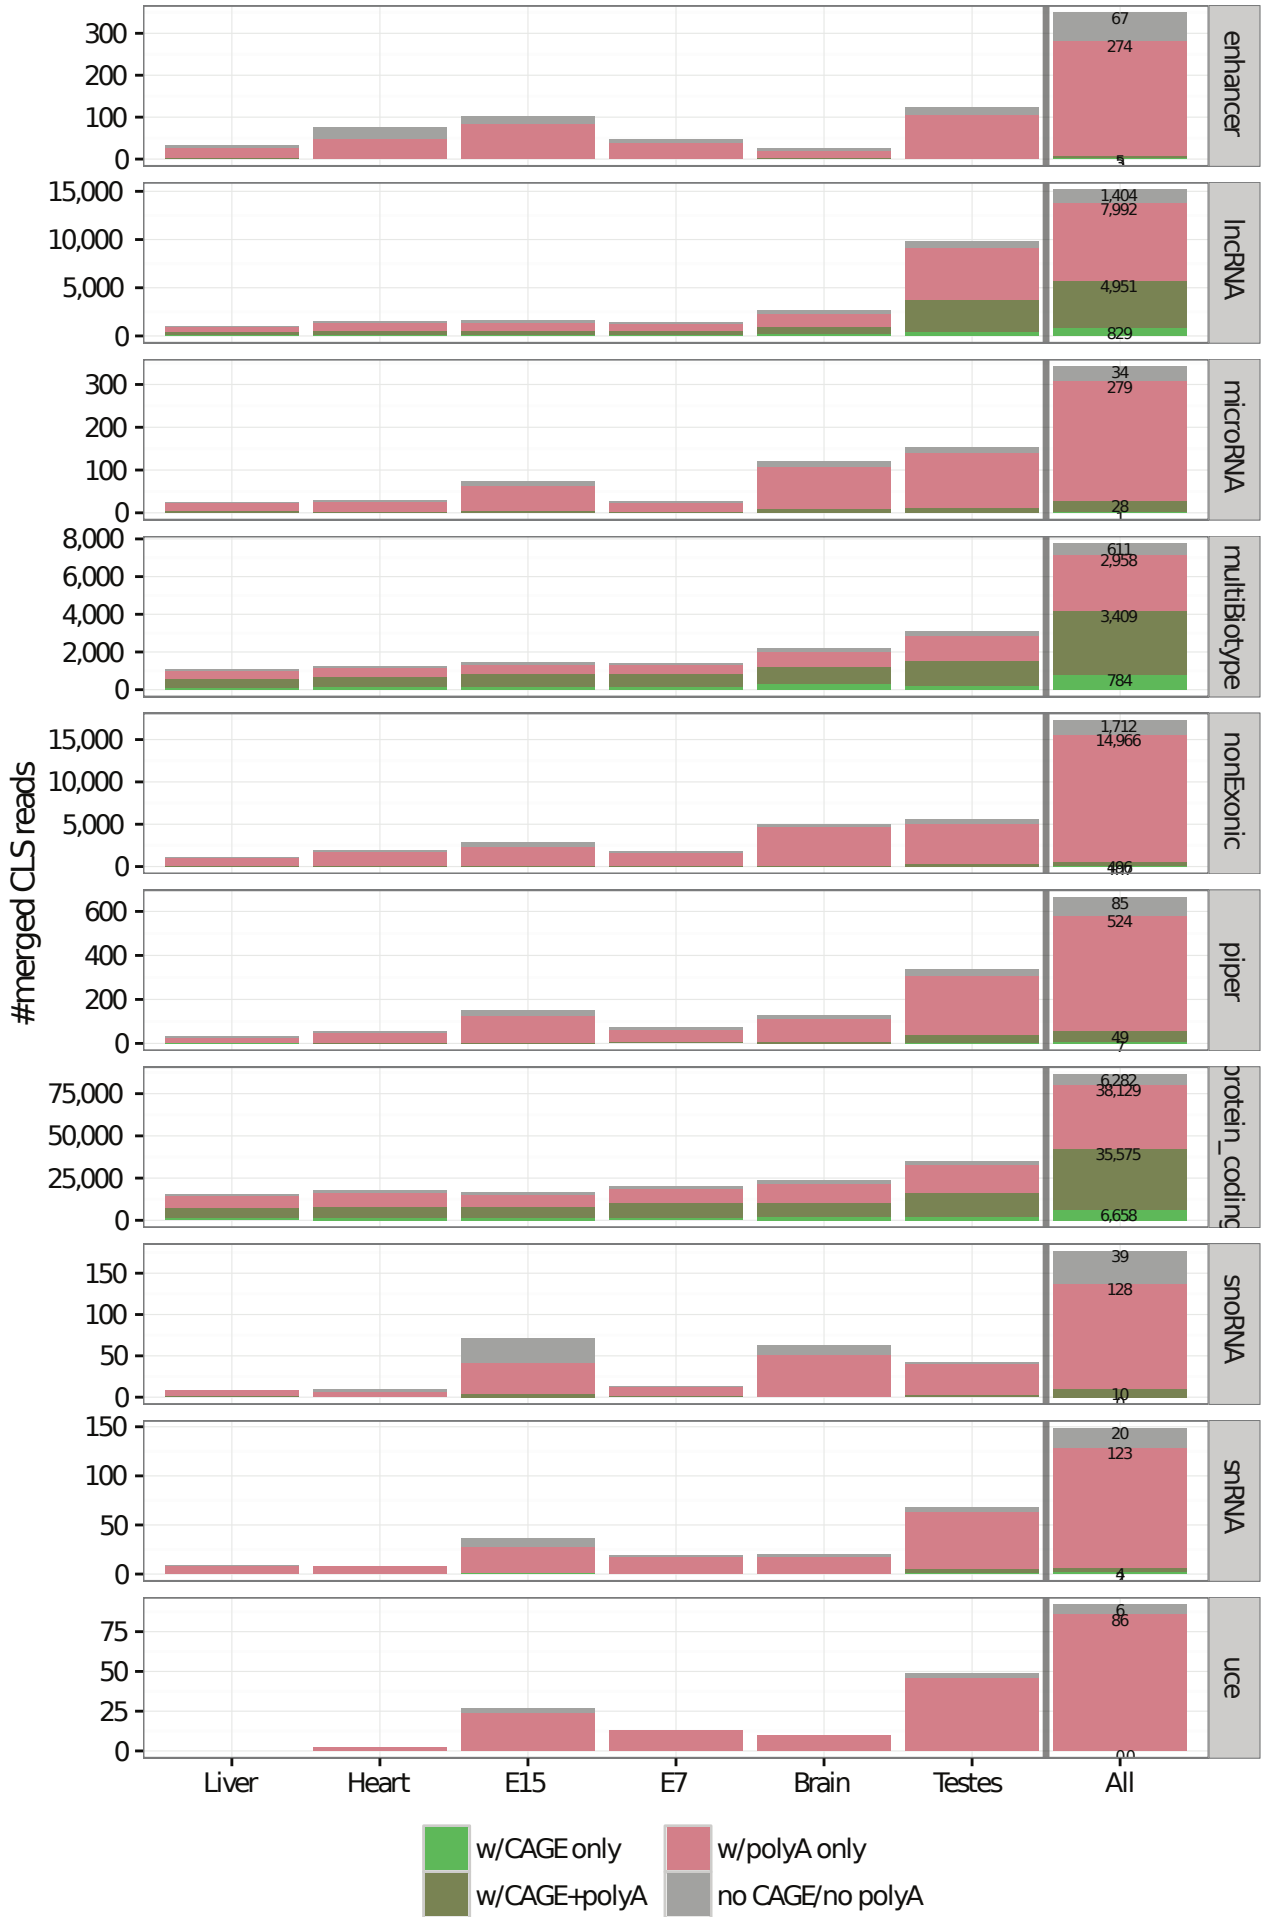

# Supplementary Figure S26

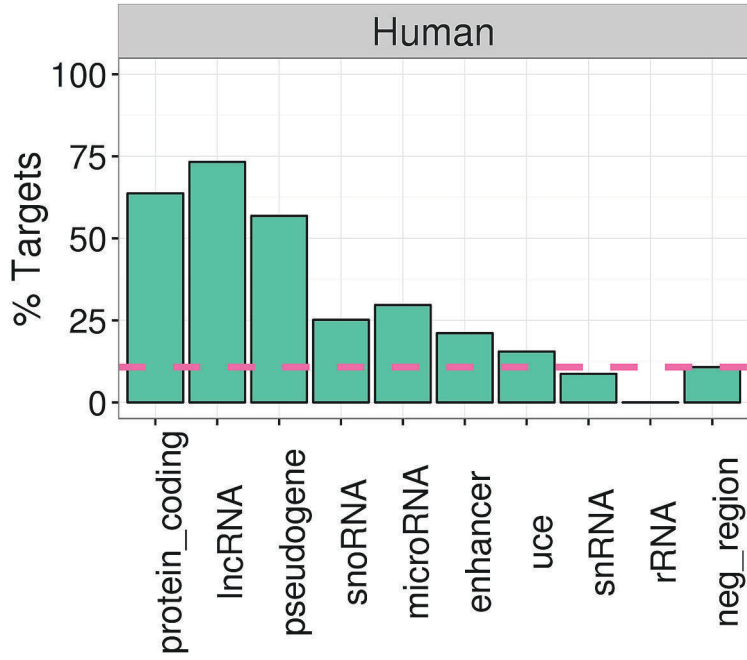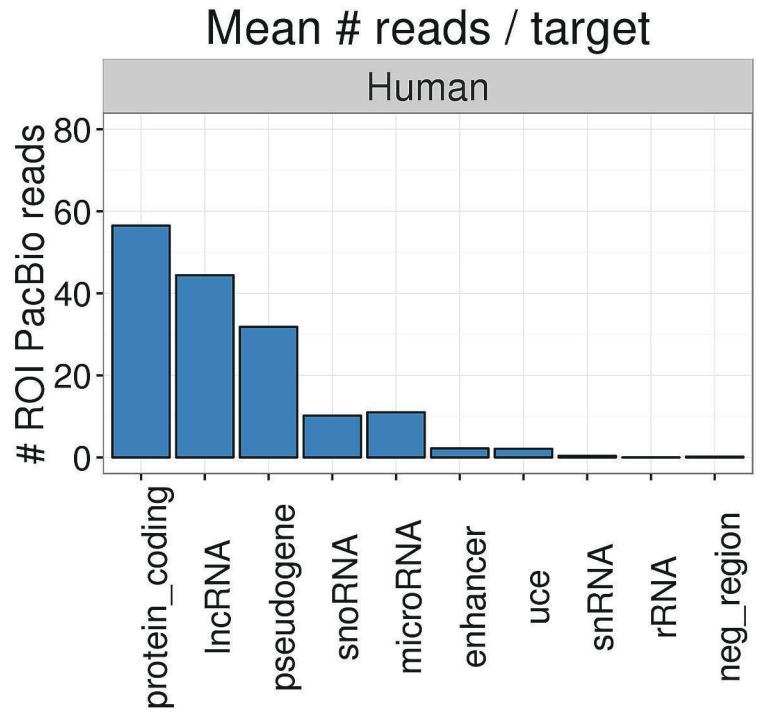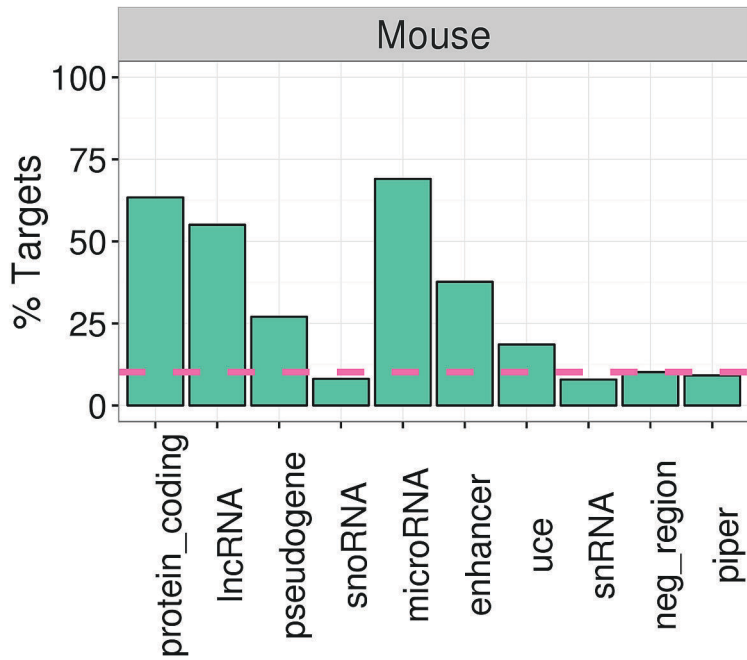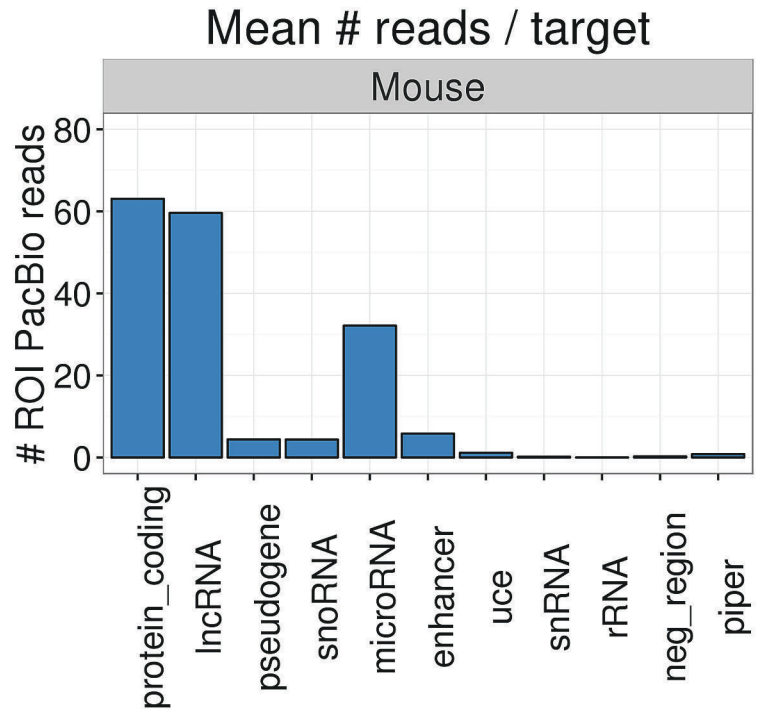

# Supplementary Figure S27

## Comparison of CLS and Short Read Transcript Discovery

Known transcripts (unique) Novel transcripts (unique)

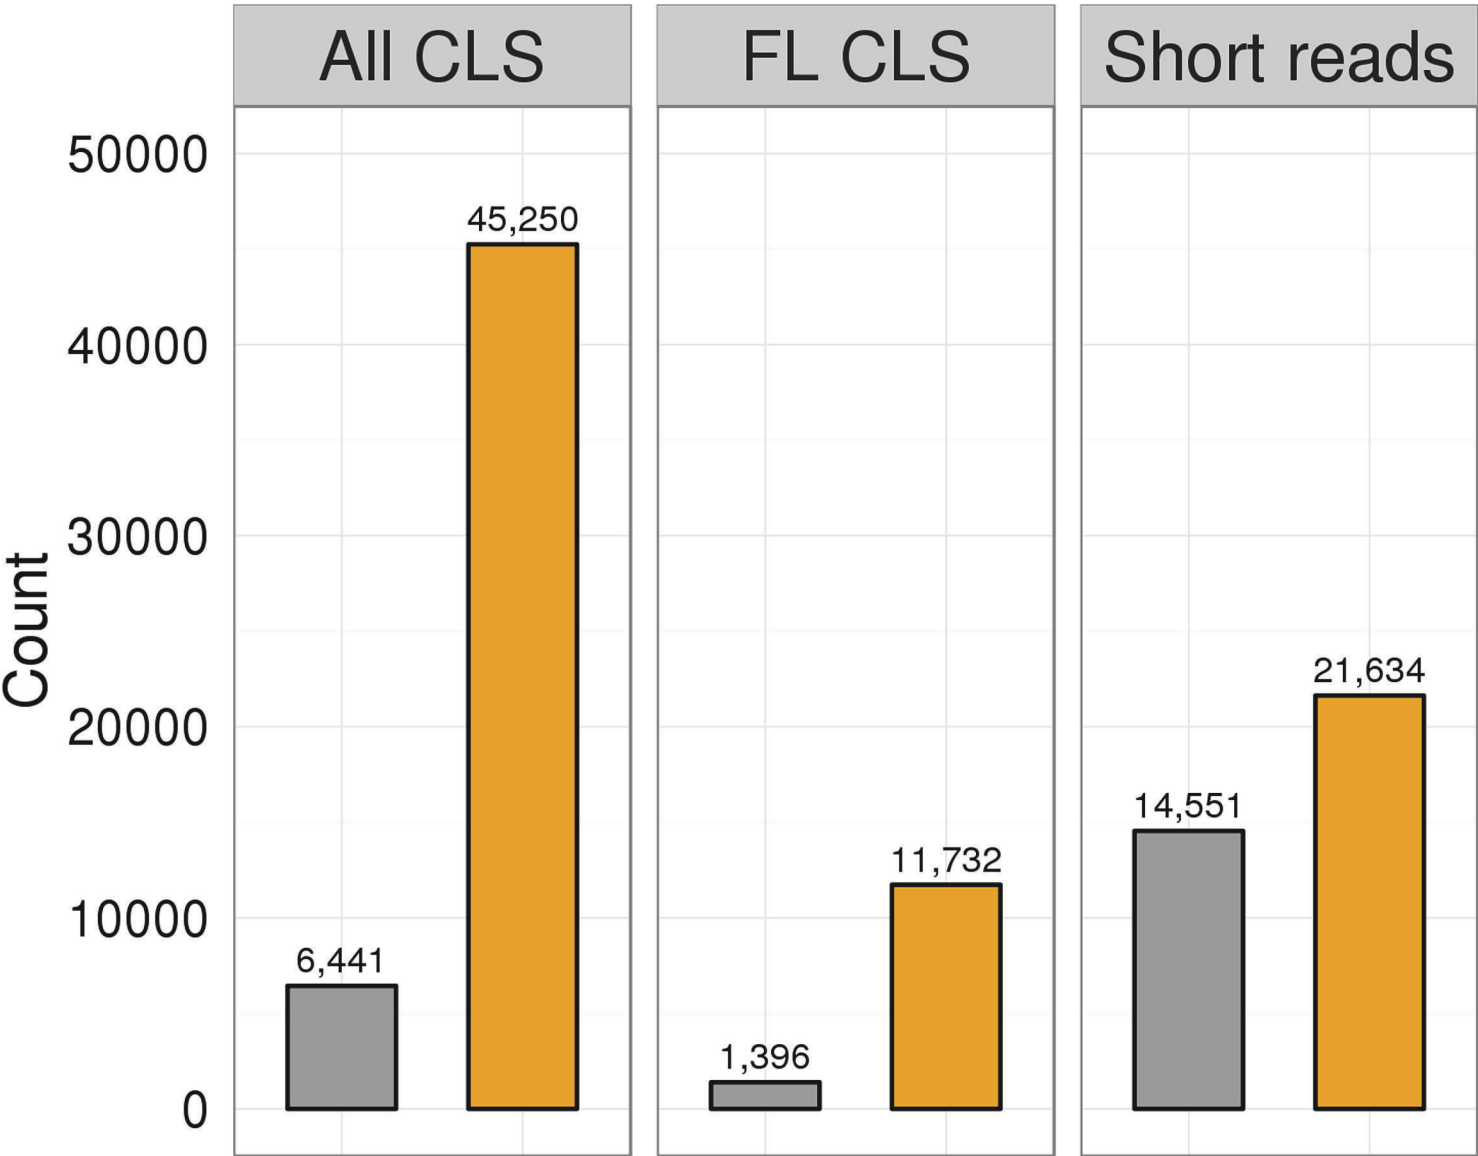

Supplementary Figure S28

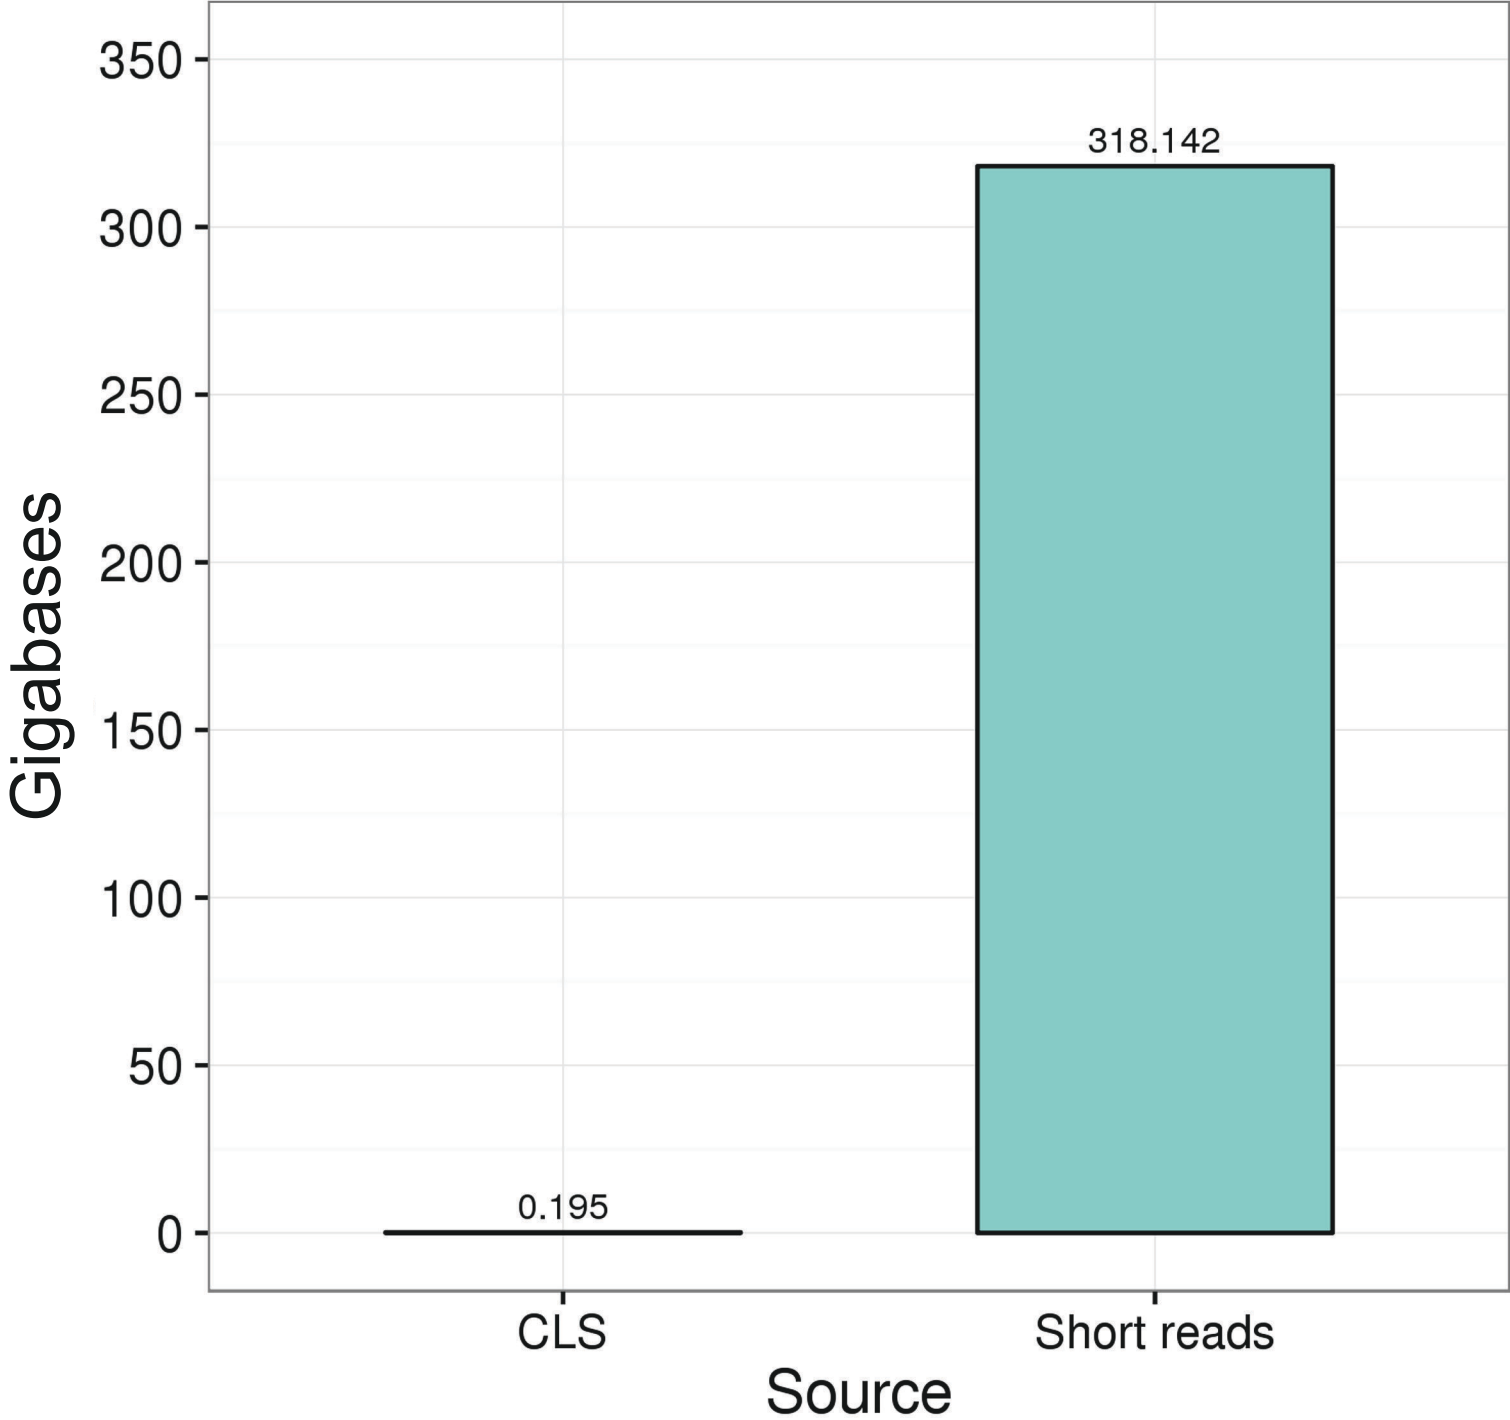



# Supplementary Figure S29

A

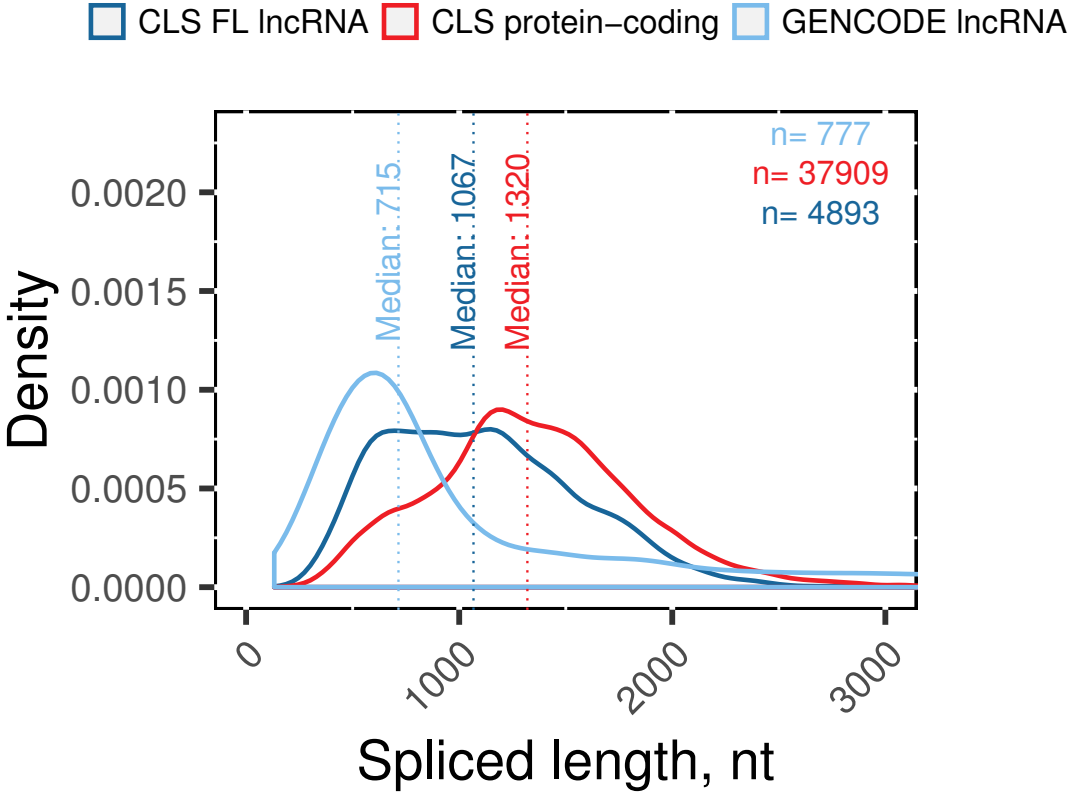

B

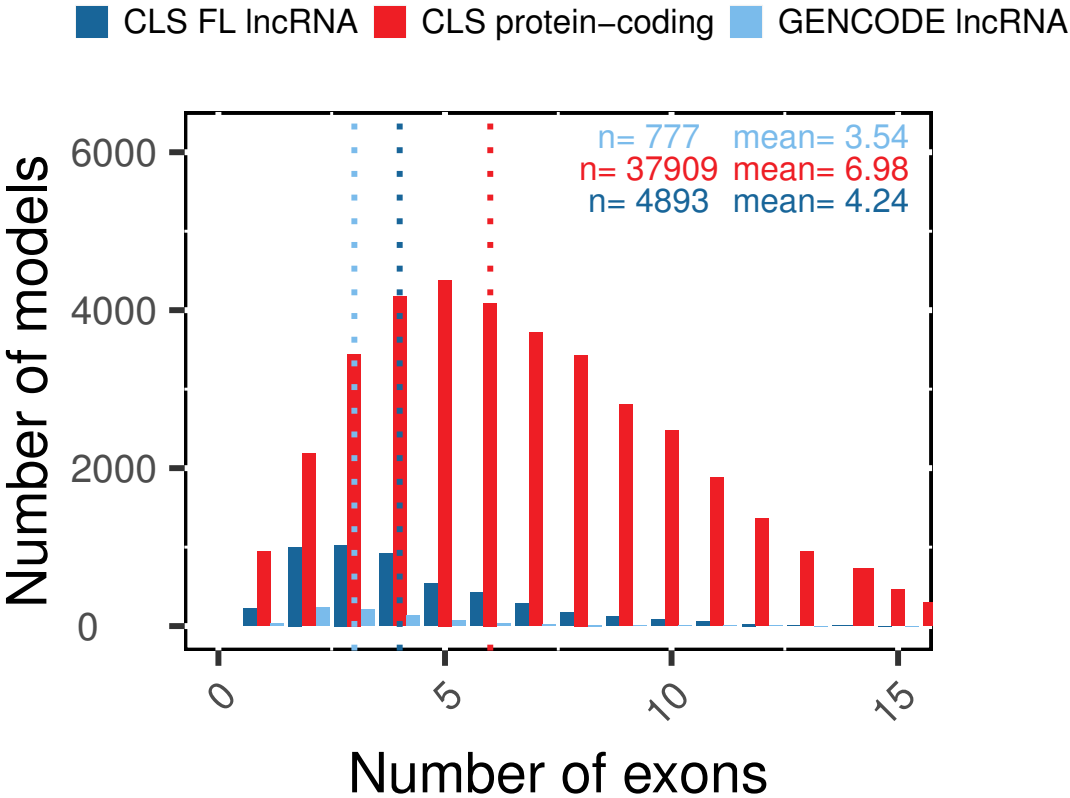

# Supplementary Figure S30

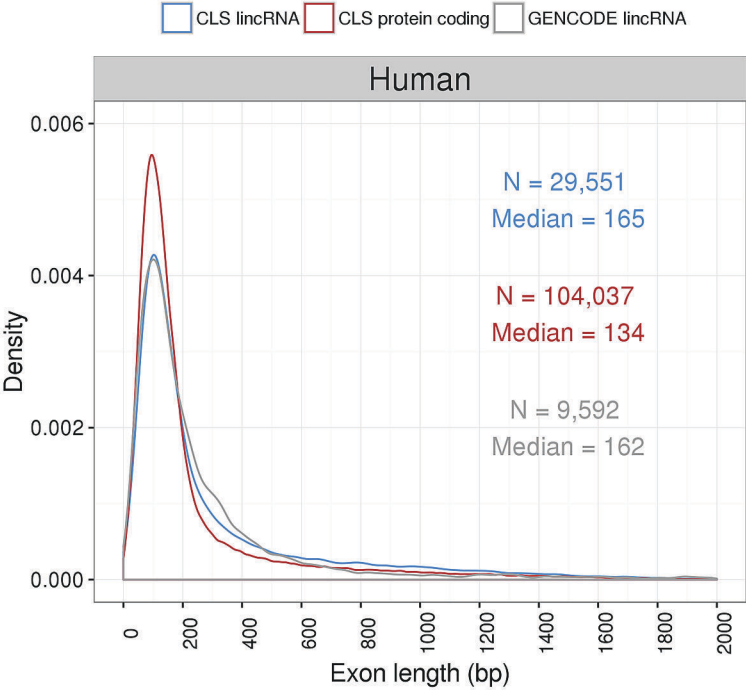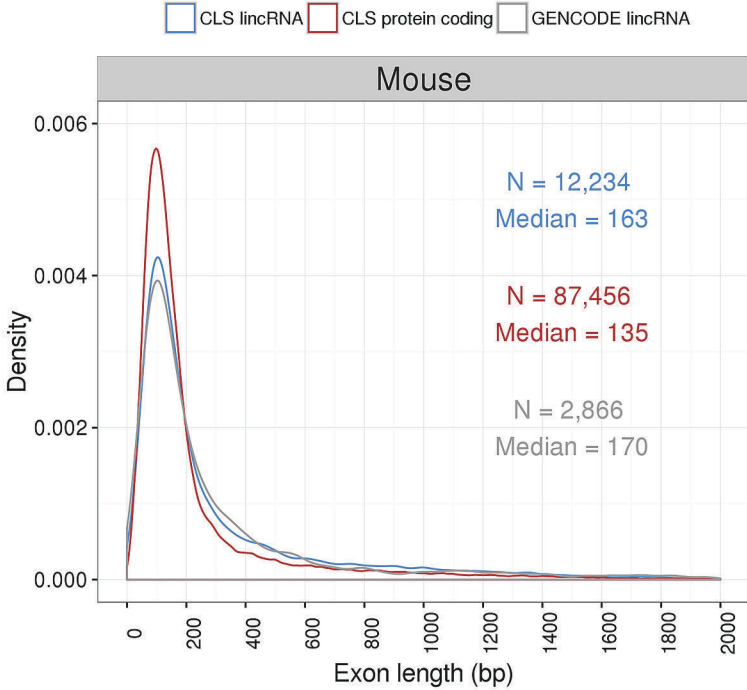

# Supplementary Figure S31

A

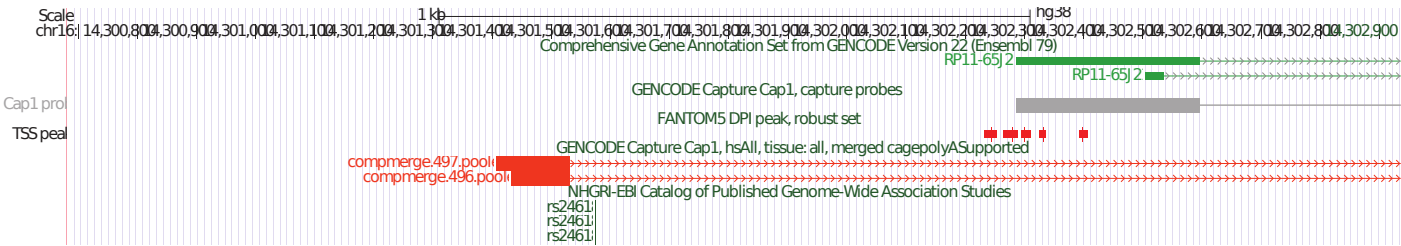

B

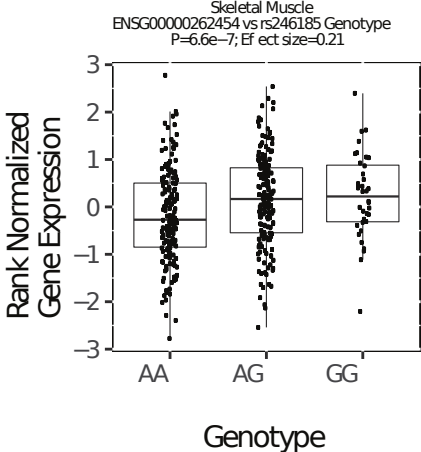

# Supplementary Figure S32

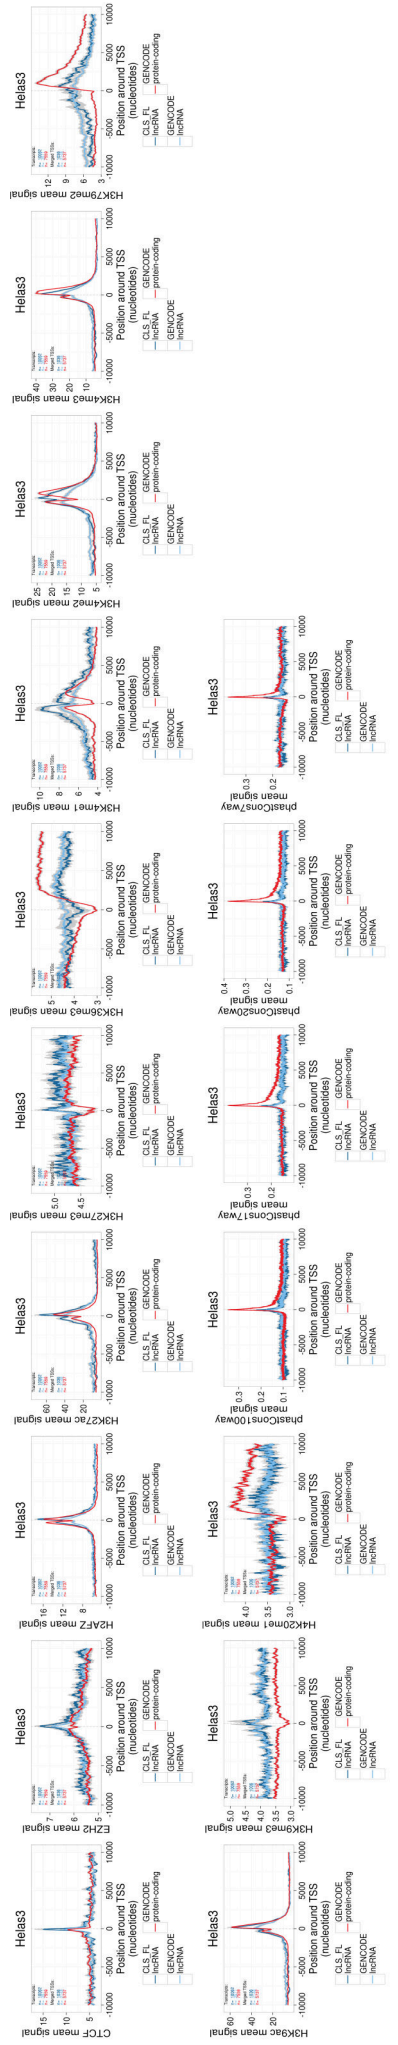



# Supplementary Figure S34

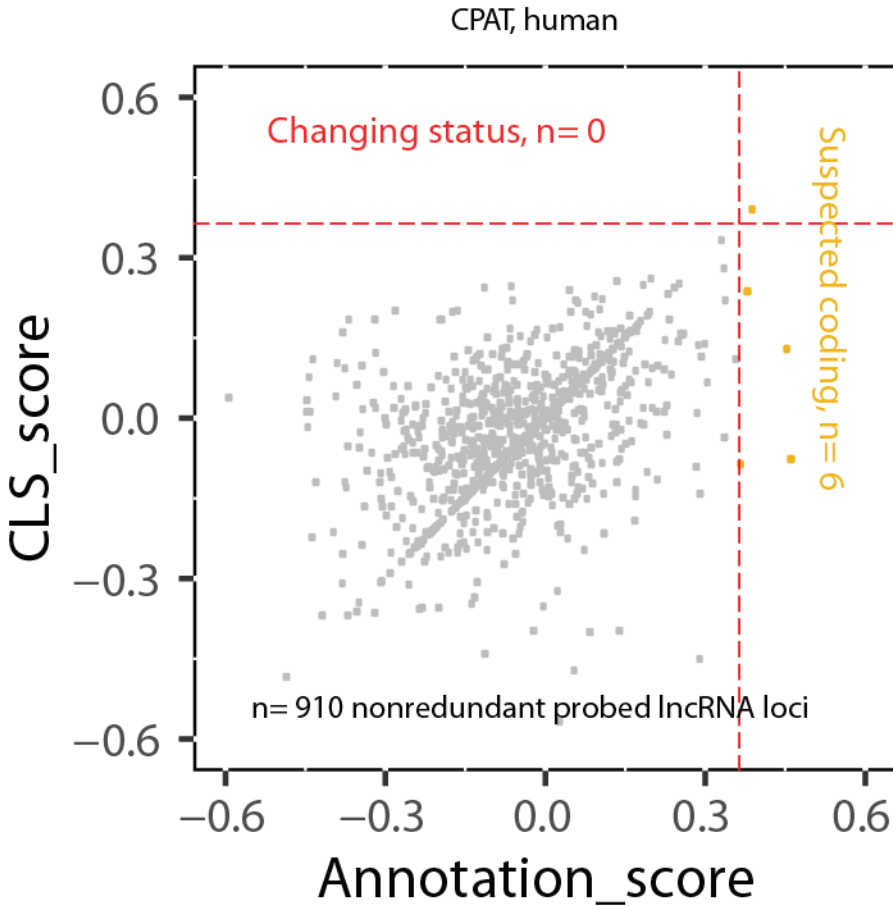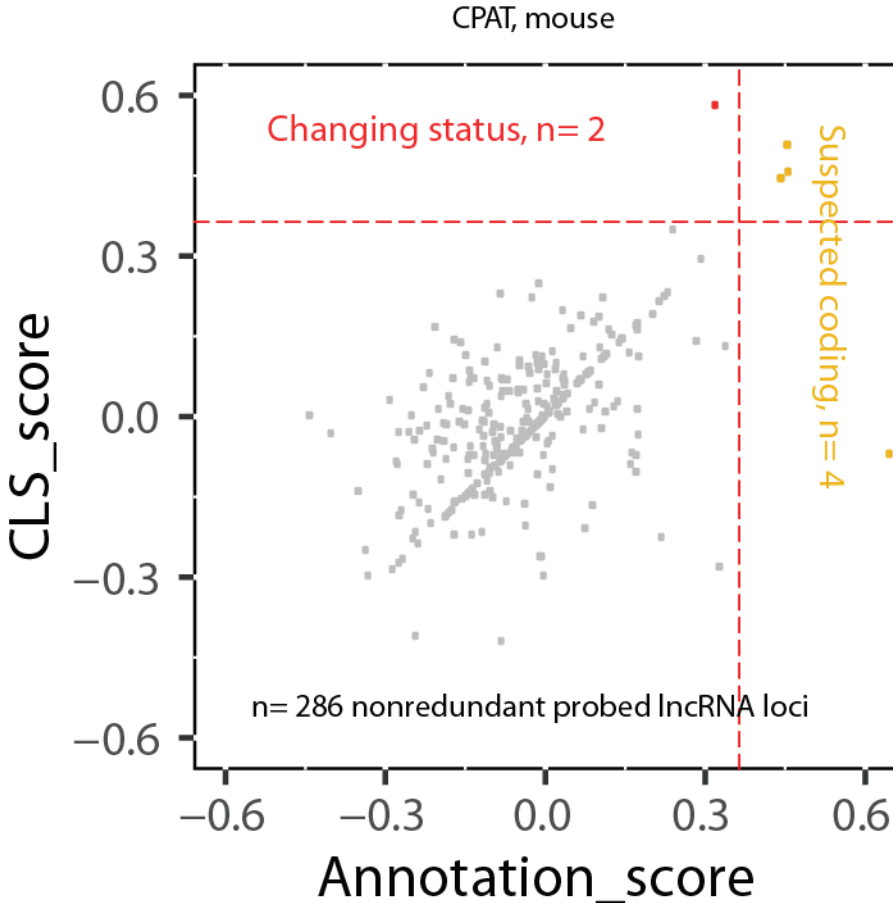





# Supplementary Figure S36

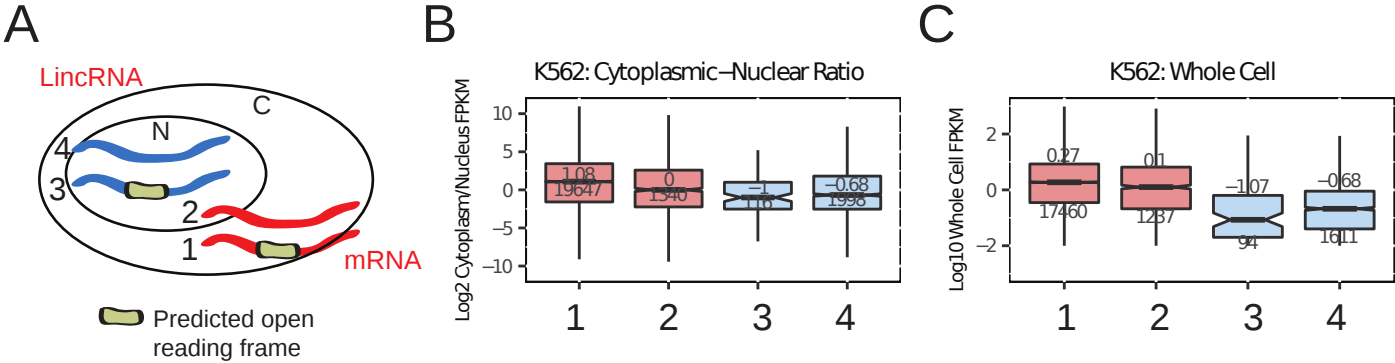



# Supplementary Figure S37

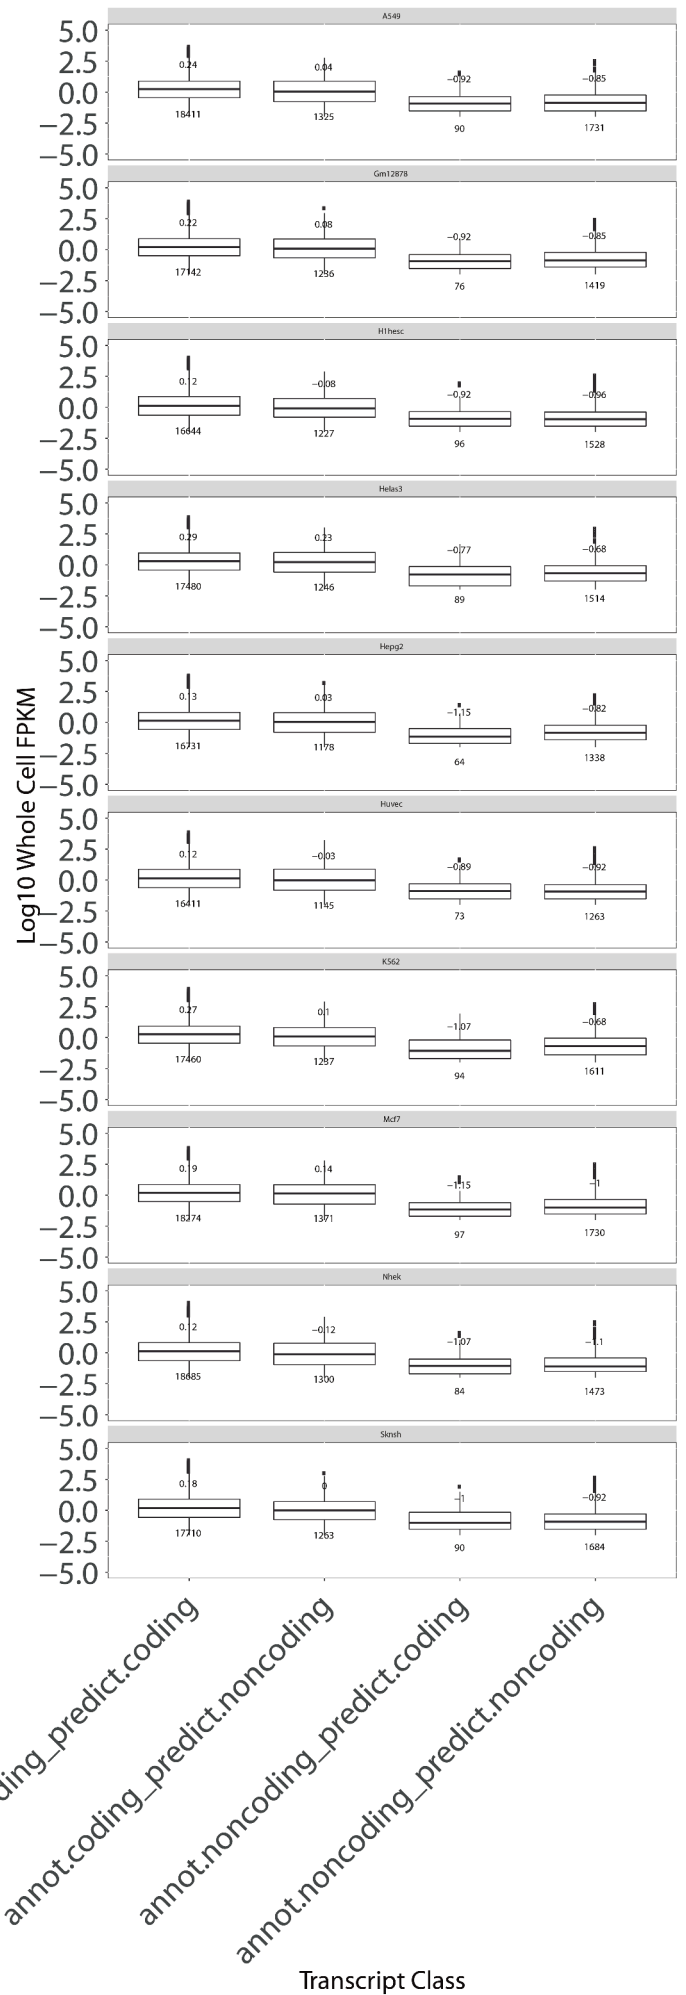

# Supplementary Figure S38

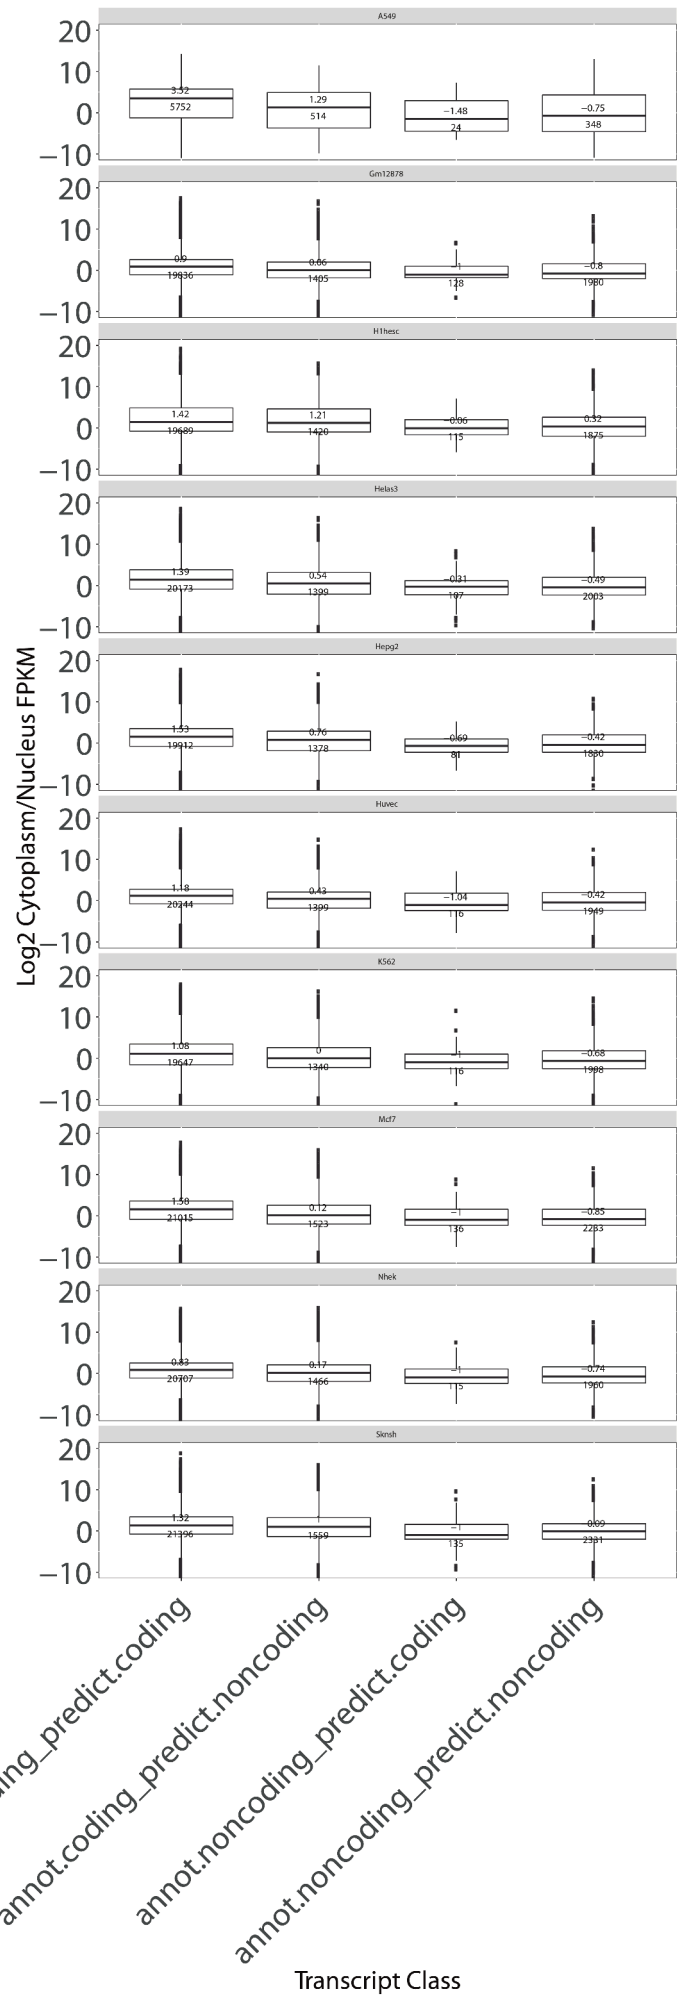

Supplementary Figure S39

Human candidates

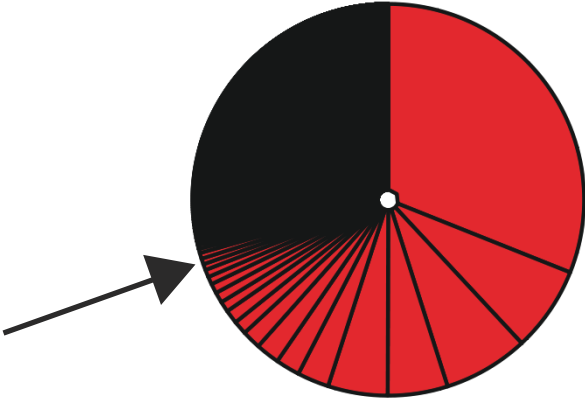

Human targets

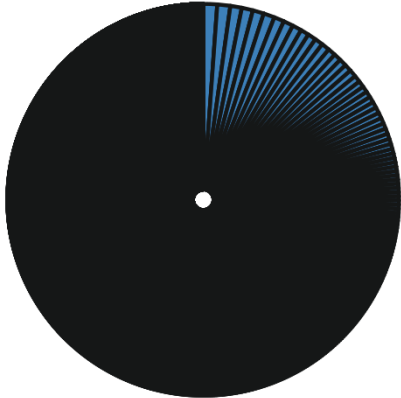

Mouse candidates

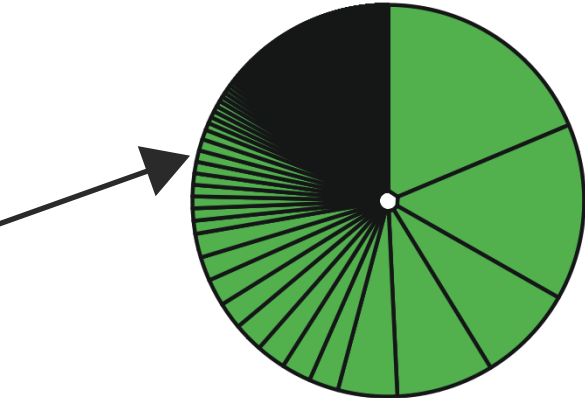

Mouse targets

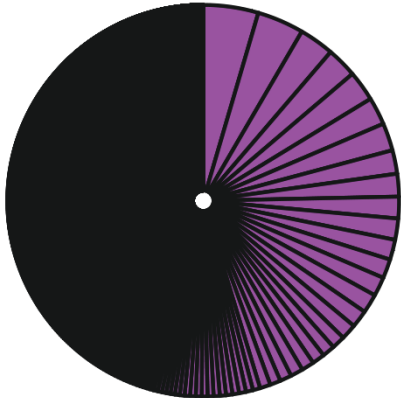

# Supplementary Figure S40

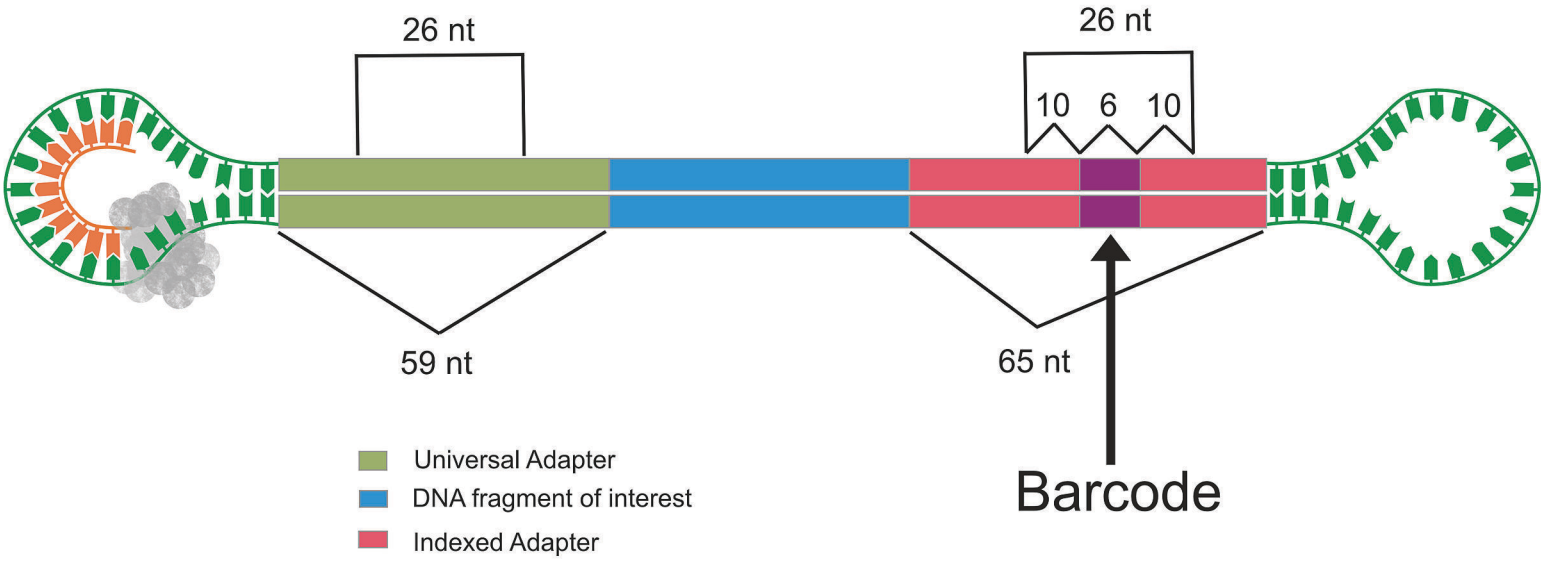

# Supplementary Figure S41

## HiSeq mapping stats

■ mapped ■ unmapped

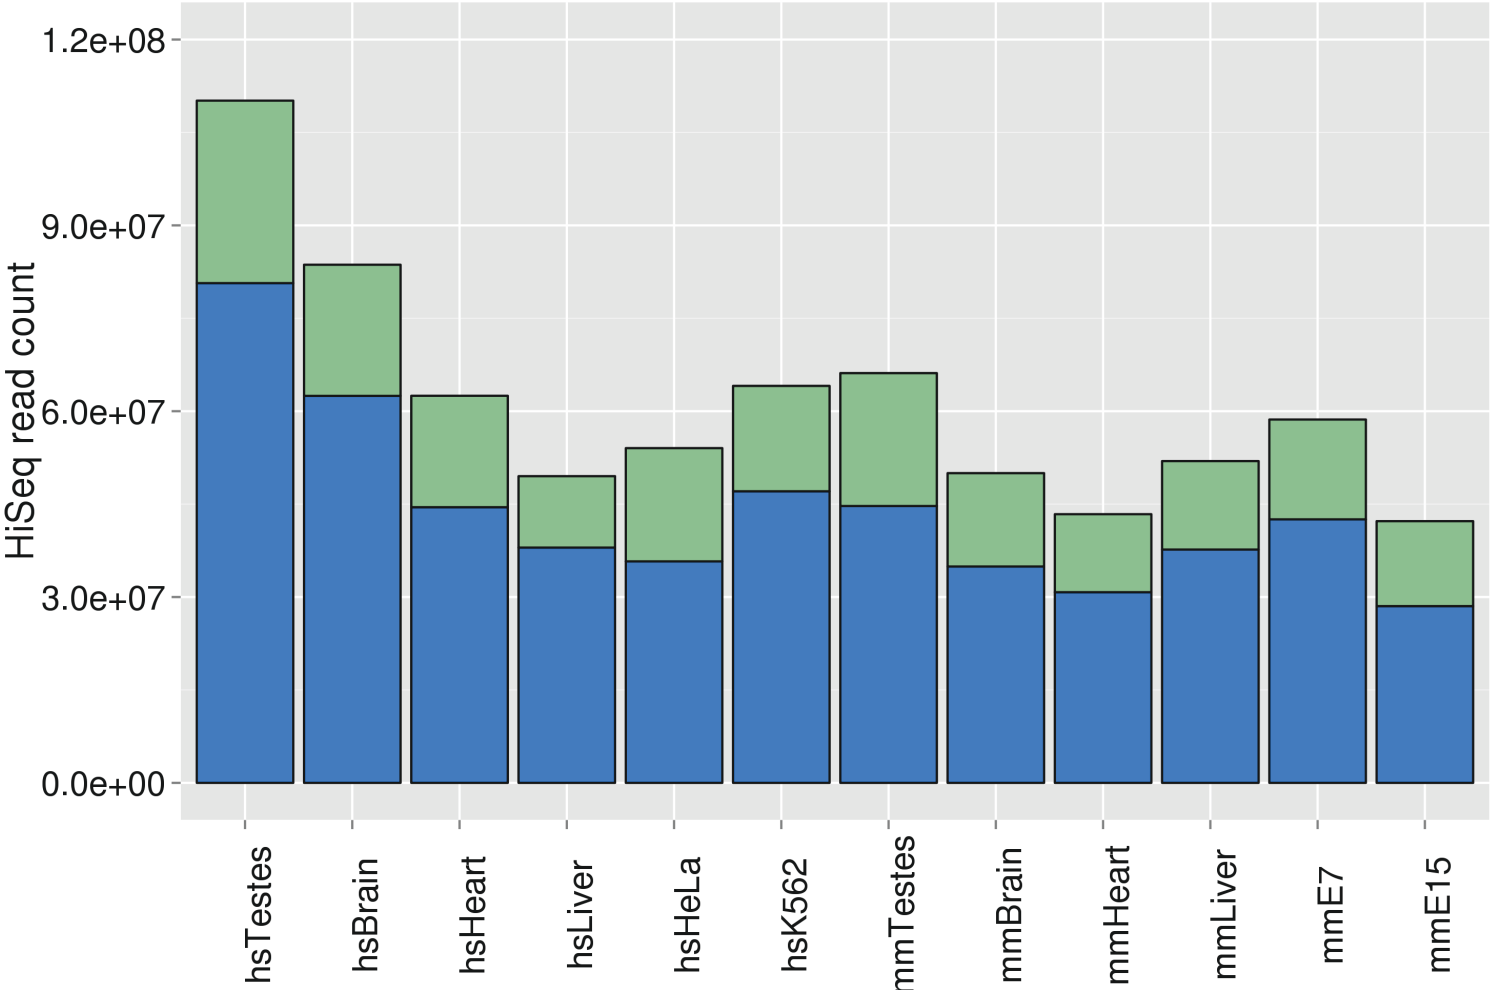

# Supplementary Figure S42

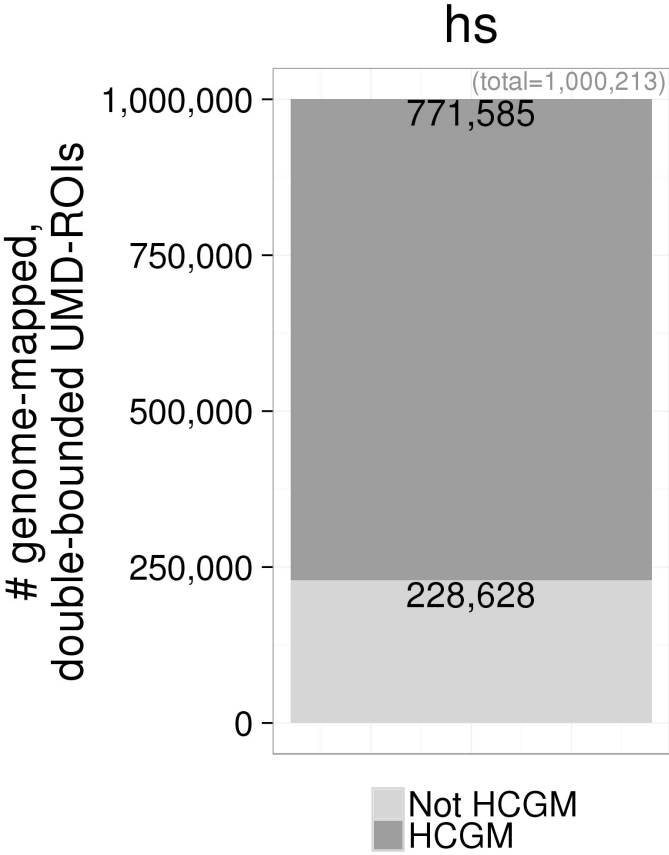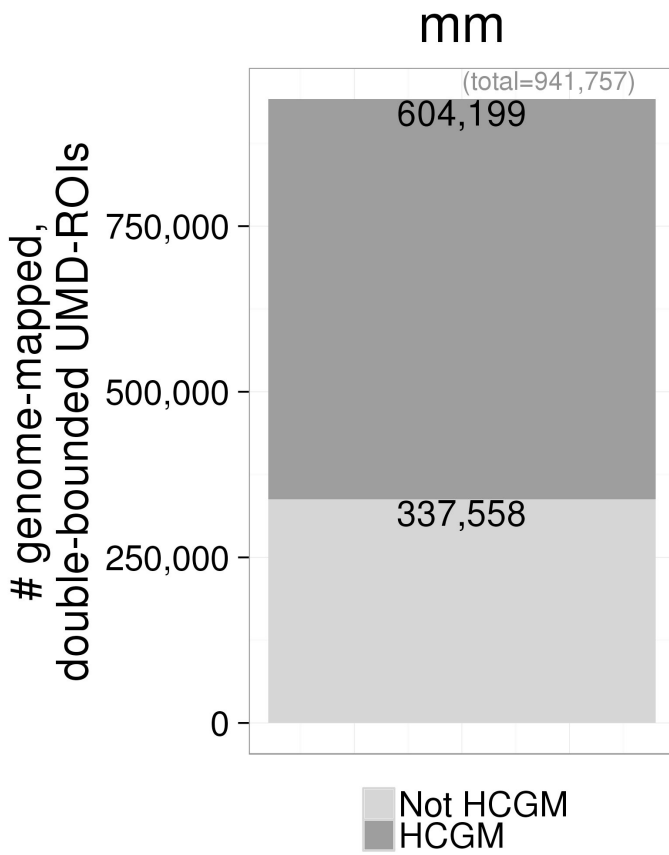

# Supplementary Figure S43

hg38 to mm10 splice site liftOver mappings stats

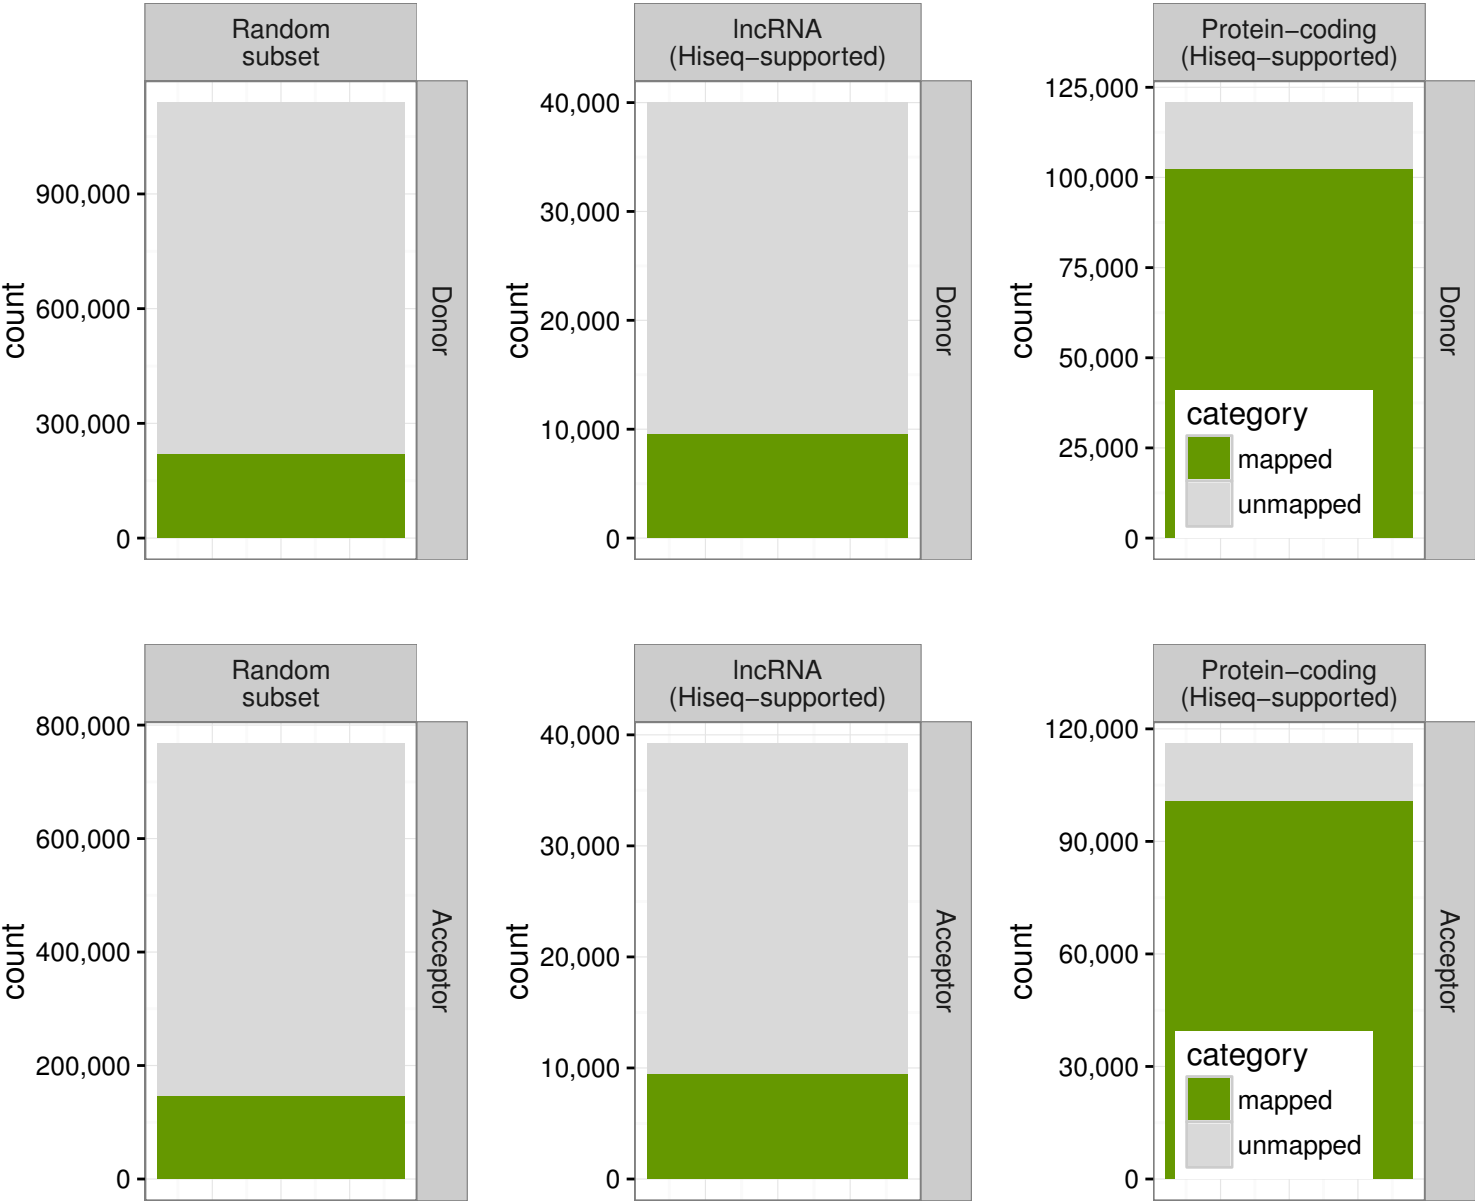

# Supplementary Figure S44

mm10 to hg38 splice site liftOver mappings stats

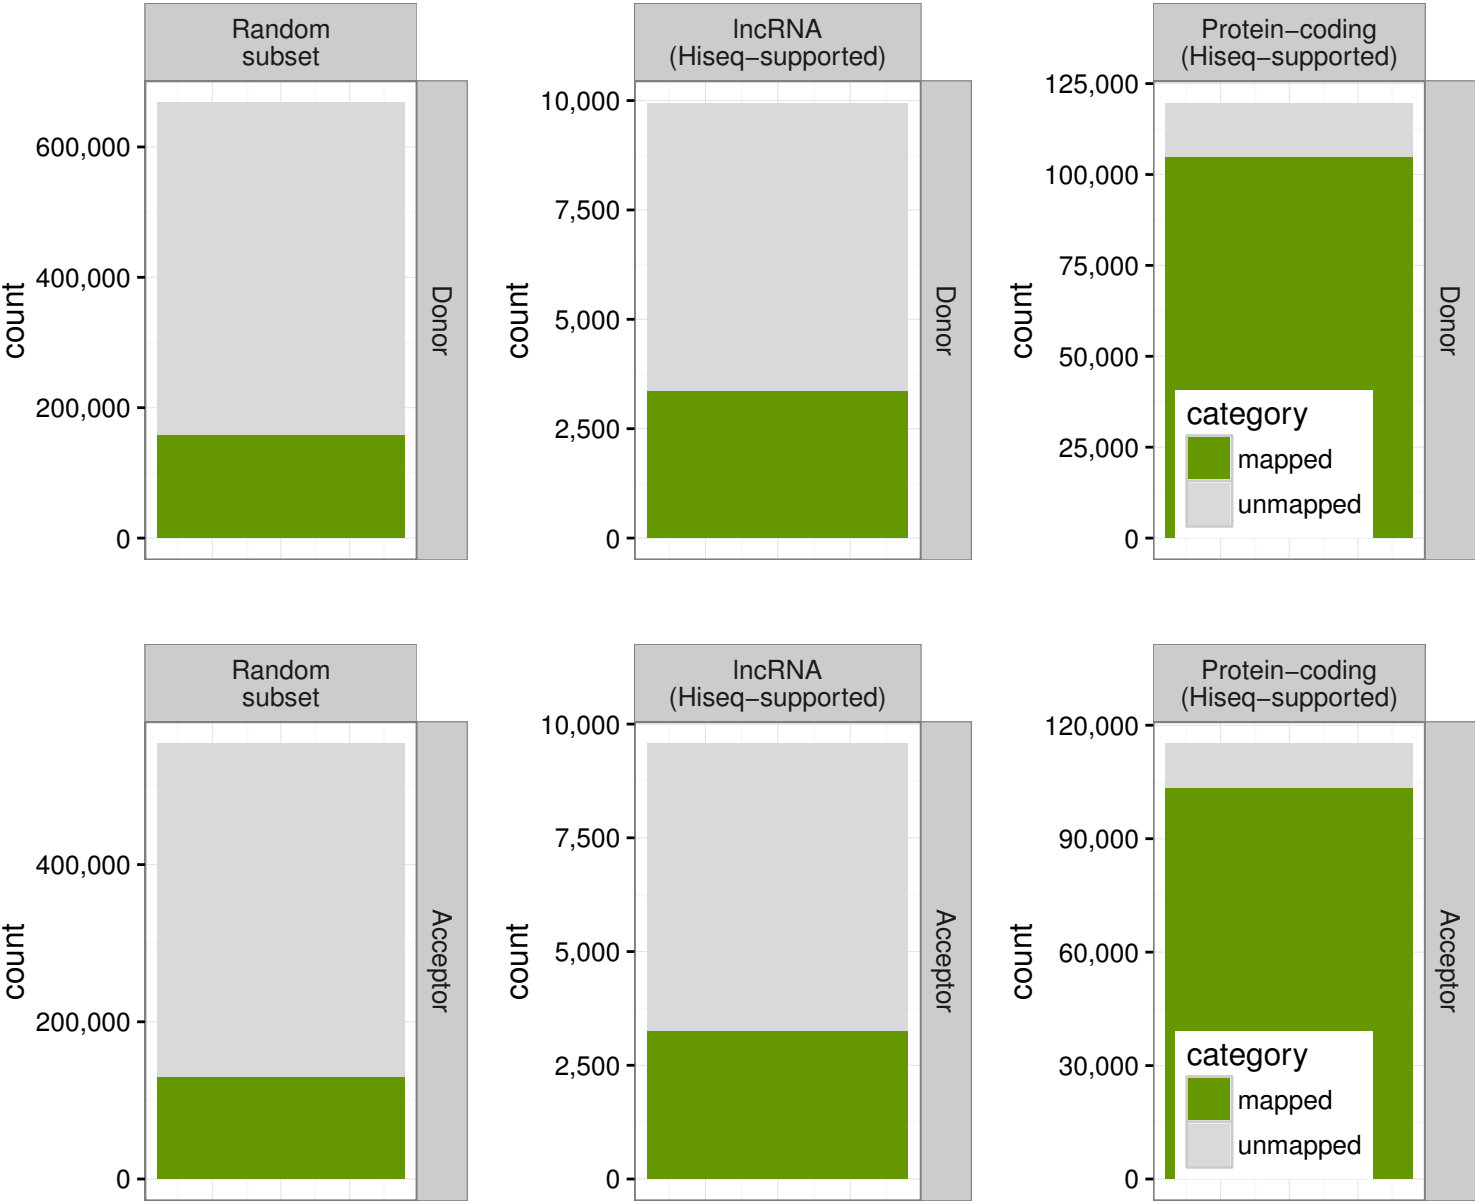



Supplementary Figure S45

# hs splice site scores

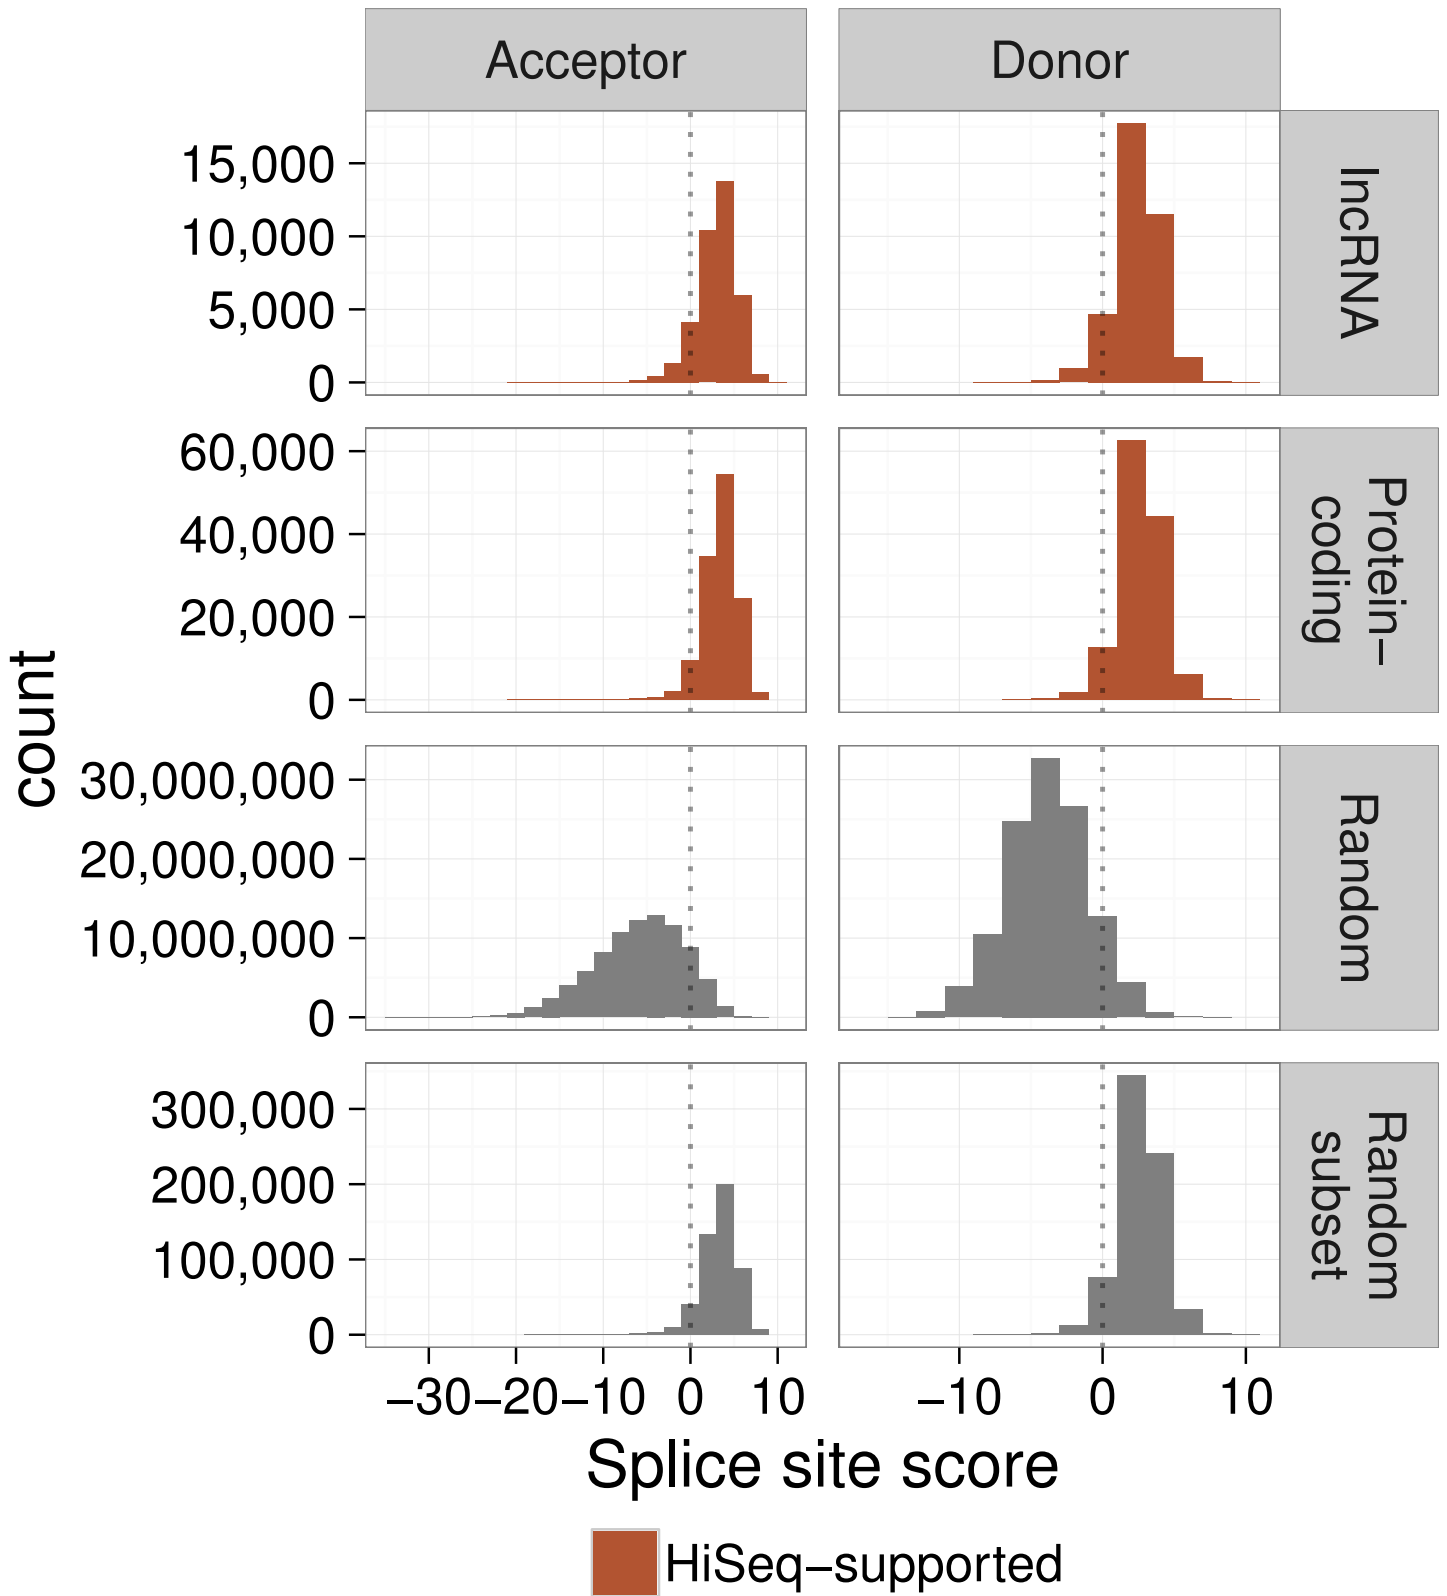

Supplementary Figure S46

# mm splice site scores

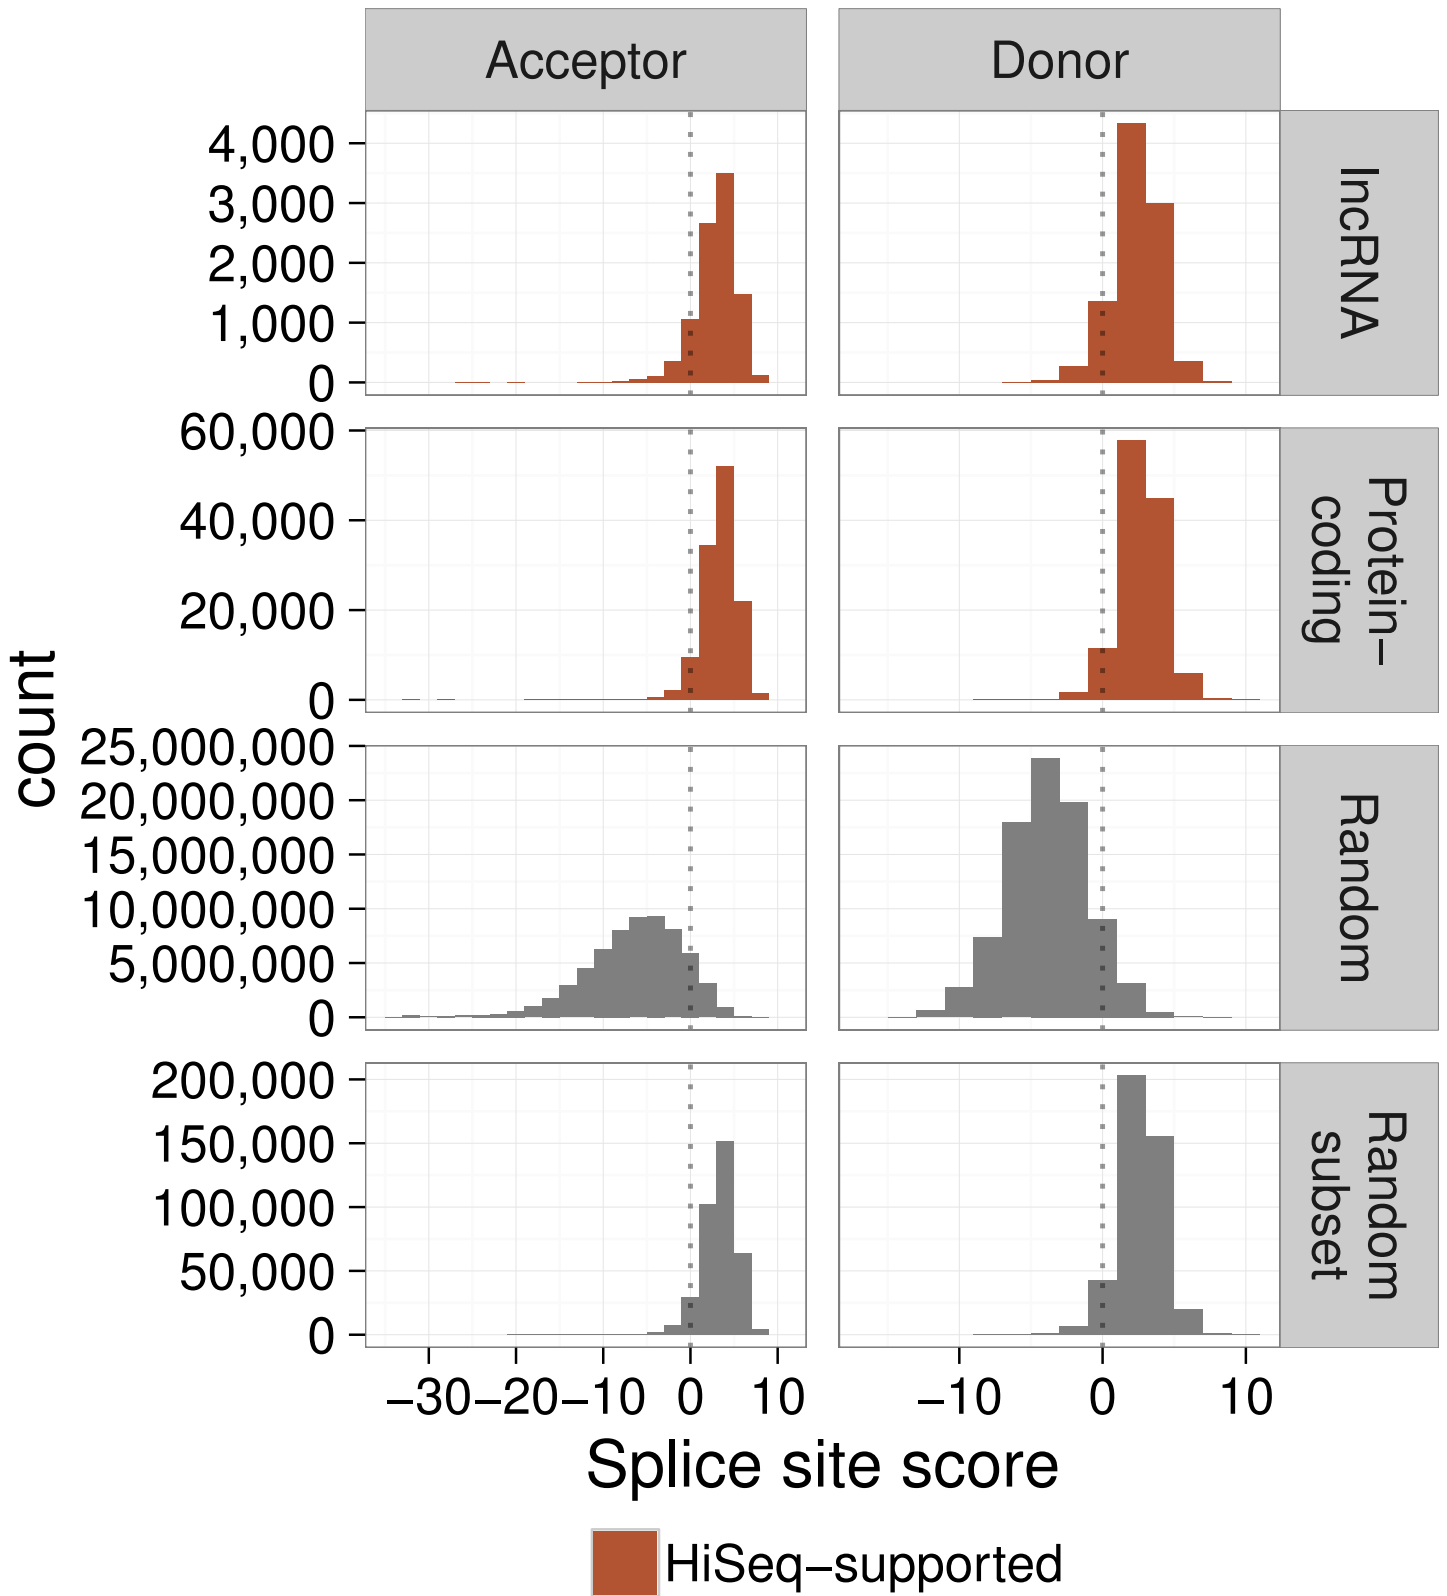

# Supplementary Figure S47

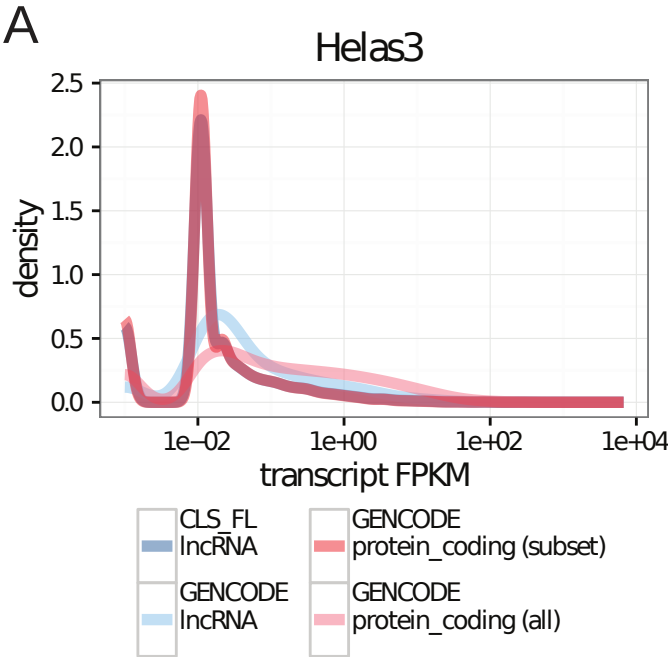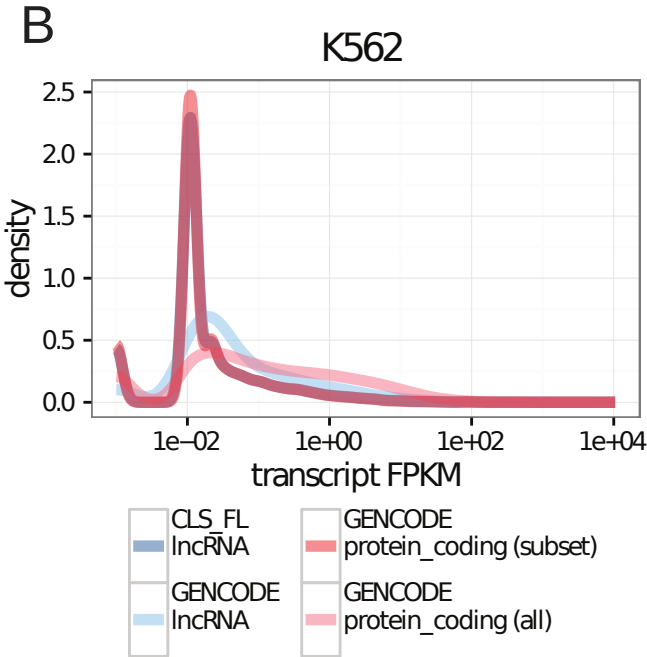



# Supplementary Figure S49

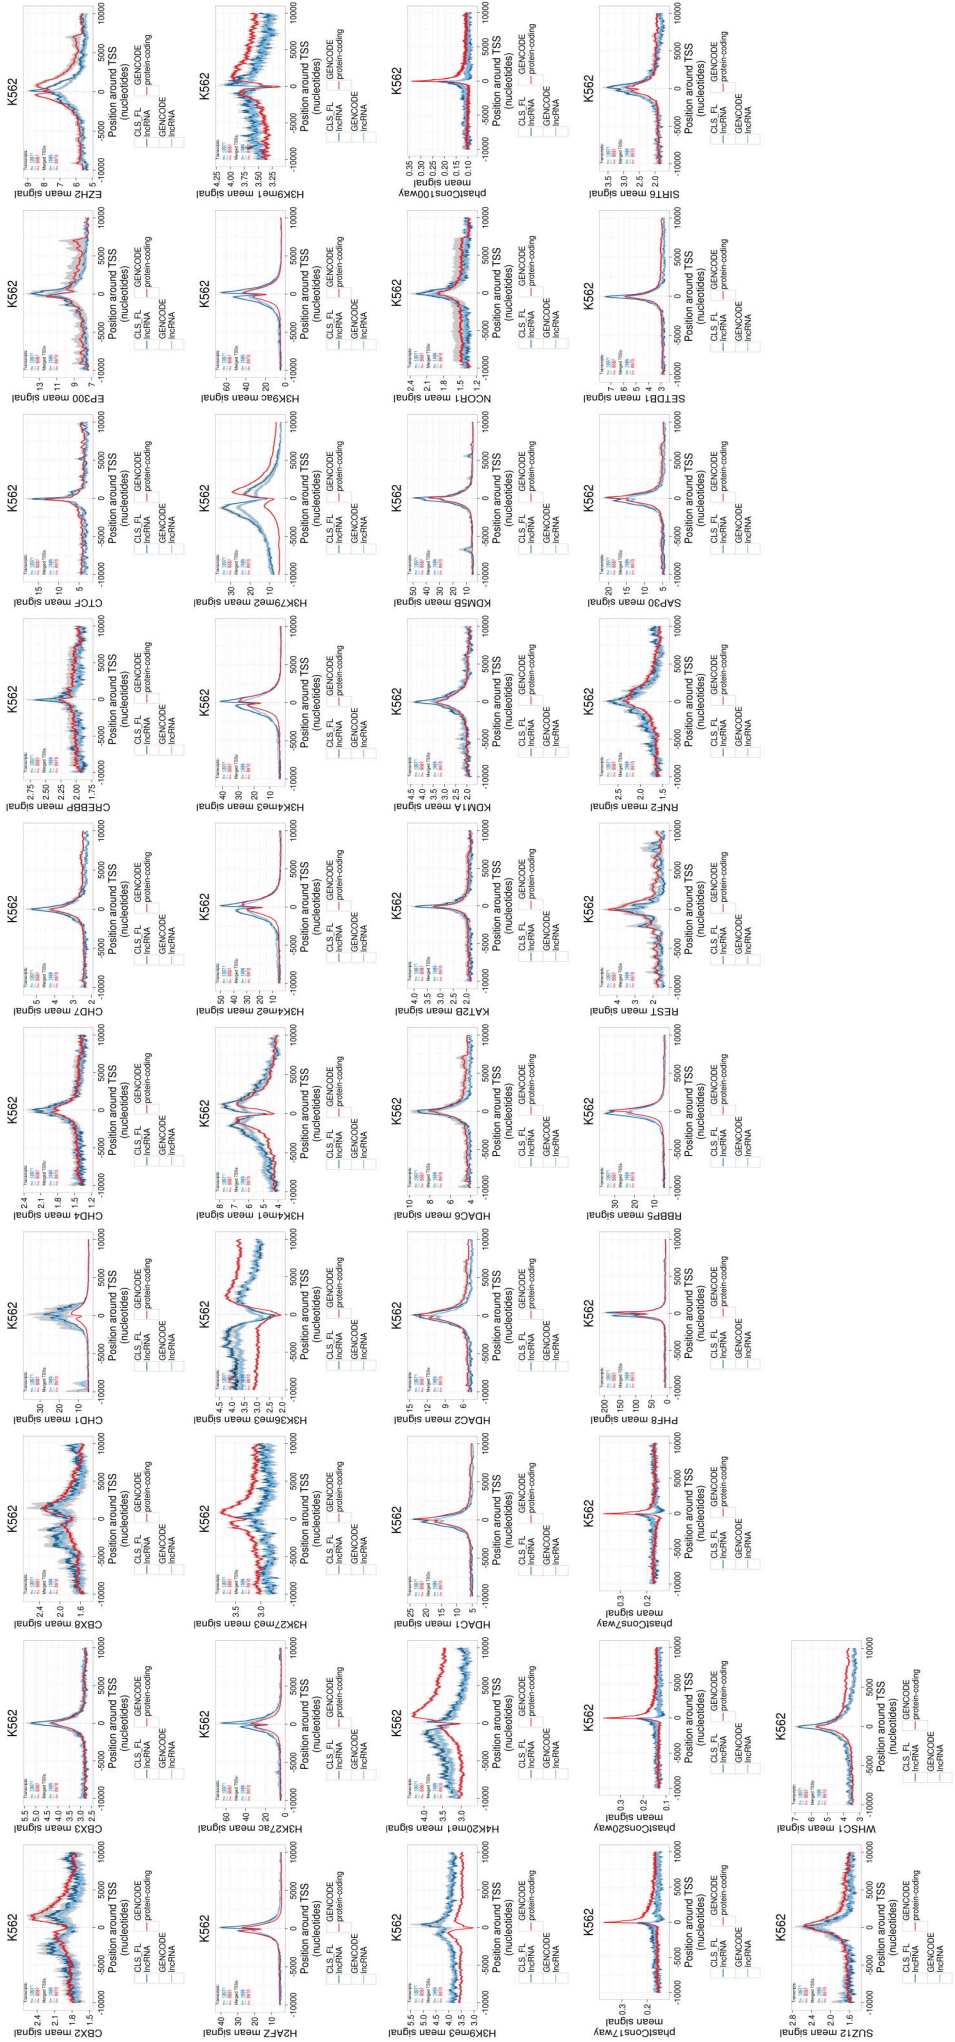

# Supplementary Figure S50

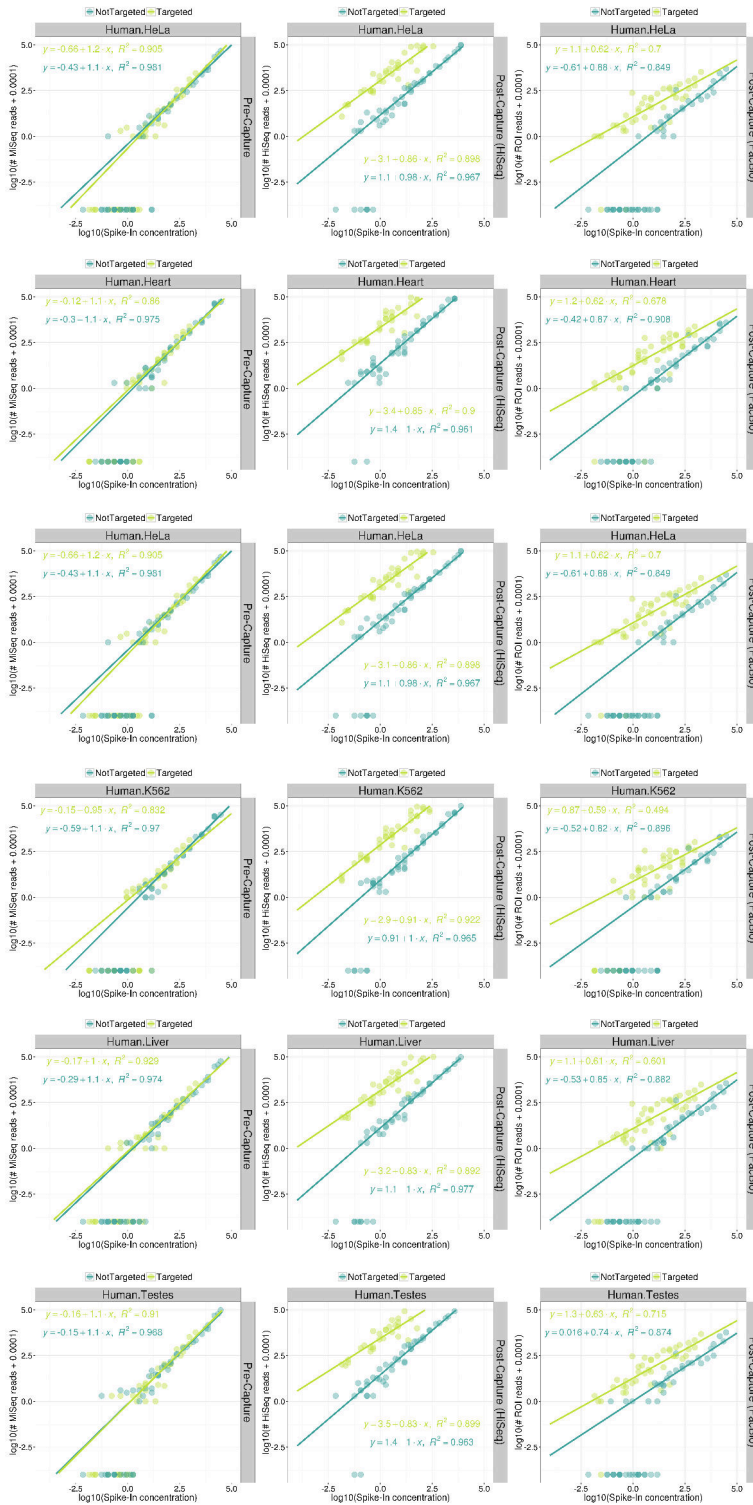

Supplement: Supplementary file [file 105064-6.pdf]
